# Supplementary material for: Cyclodextrin-Enabled Enantioselective Complexation Study of Cathinone Analogs
Source: MDPI journal article supplement (doi:10.3390/molecules29040876), 2024-02-16
Supplement: s1 [file s1]

**Content:** **Table S1:** Cathinone-CD complex stability constants and their mobility values measured by affinity capillary electrophoresis at 30 mM phosphate buffer (pH 7.4)., **Table S2:** Enantioseparation of cathinones applying various CDs., **Table S3:** Cathinone-CD complex stability constants and complex mobilities measured by affinity capillary electrophoresis at 20 mM acetate buffer (pH 4.5)., **Figure S1.** Representative electropherograms of 4-MEC – S- $\beta$ -CD complexes in the presence of increasing CD concentration. Further conditions and CD abbreviations can be found in 3.2. *Capillary electrophoresis* and 3.1. *Materials* section. **Figure S2.** Selected  $^1\text{H}$  NMR resonances of mephedrone in a 1:1 native  $\beta$ -CD:mephedrone system indicating no diastereotopic splitting (600 MHz, 298 K,  $\text{D}_2\text{O}$ ). Further conditions can be found in 3.3 *NMR experiments* section. **Figure S3.** Selected  $^1\text{H}$  NMR resonances of butylone in a 1:1 native  $\beta$ -CD:butylone system indicating diastereotopic splitting due to the presence of the chiral selector  $\beta$ -CD (600 MHz, 298 K,  $\text{D}_2\text{O}$ ). Further conditions can be found in 3.3 *NMR experiments* section. **Figure S4.** Selected  $^1\text{H}$  NMR resonances of mephedrone in a 2:1 6-(SB) $\gamma$ - $\beta$ -CD:mephedrone system indicating no diastereotopic splitting (600 MHz, 298 K,  $\text{D}_2\text{O}$ ). Further conditions can be found in 3.3 *NMR experiments* section. **Figure S5.** Selected  $^1\text{H}$  NMR resonances of butylone in a 2:1 6-(SB) $\gamma$ - $\beta$ -CD:butylone system indicating diastereotopic splitting due to the presence of the chiral selector 6-(SB) $\gamma$ - $\beta$ -CD (600 MHz, 298 K,  $\text{D}_2\text{O}$ ). Further conditions can be found in 3.3 *NMR experiments* section. **Figure S6.** Selected  $^1\text{H}$  NMR resonances of mephedrone in a 2:1 Succ- $\beta$ -CD:mephedrone system indicating diastereotopic splitting due to the presence of the chiral selector Succ- $\beta$ -CD (600 MHz, 298 K,  $\text{D}_2\text{O}$ ). Further conditions can be found in 3.3 *NMR experiments* section. **Figure S7.** Selected  $^1\text{H}$  NMR resonances of butylone in a 2:1 Succ- $\beta$ -CD:butylone system indicating diastereotopic splitting due to the presence of the chiral selector Succ- $\beta$ -CD (600 MHz, 298 K,  $\text{D}_2\text{O}$ ). Further conditions can be found in 3.3 *NMR experiments* section. **Figure S8.** Selected  $^1\text{H}$  NMR resonances of mephedrone in a 2:1 SBX:mephedrone system indicating no diastereotopic splitting (600 MHz, 298 K,  $\text{D}_2\text{O}$ ). Further conditions can be found in 3.3 *NMR experiments* section. **Figure S9.** Selected  $^1\text{H}$  NMR resonances of butylone in a 2:1 SBX:butylone system indicating diastereotopic splitting due to the presence of the chiral selector SBX (600 MHz, 298 K,  $\text{D}_2\text{O}$ ). Further conditions can be found in 3.3 *NMR experiments* section. **Figure S10.** The 2D ROESY spectrum of butylone -  $\beta$ -CD complex. Further conditions can be found in 3.3. *NMR experiments* section., **Figure S11.** The 2D ROESY spectrum of mephedrone -  $\beta$ -CD complex. Further conditions can be found in 3.3. *NMR experiments* section., **Figure S12.** The 2D ROESY spectrum of butylone - Succ- $\beta$ -CD complex. Further conditions can be found in 3.3. *NMR experiments* section., **Figure S13.** The 2D ROESY spectrum of mephedrone - Succ- $\beta$ -CD complex. Further conditions can be found in 3.3. *NMR experiments* section., **Figure S14.** The 2D ROESY spectrum of butylone - 6-(SB) $\gamma$ - $\beta$ -CD complex. Further conditions can be found in 3.3. *NMR experiments* section., **Figure S15.** The 2D ROESY spectrum of mephedrone - 6-(SB) $\gamma$ - $\beta$ -CD complex. Further conditions can be found in 3.3. *NMR experiments* section., **Figure S16.** The 2D ROESY spectrum of butylone - SBX complex. Further conditions can be found in 3.3. *NMR experiments* section., **Figure S17.** The 2D ROESY spectrum of mephedrone – SBX complex. Further conditions can be found in 3.3. *NMR experiments* section., **Figure S18.** The  $^1\text{H}$  NMR spectrum (a) and partial 2D ROESY spectrum (b) of butylone -  $\beta$ -CD complex. Further conditions can be found in 3.3. *NMR experiments* section., **Figure S19.** The  $^1\text{H}$  NMR spectrum (a) and partial 2D ROESY spectrum (b) of mephedrone –  $\beta$ -CD complex. Further conditions can be found in 3.3. *NMR experiments* section., **Figure S20.** The  $^1\text{H}$  NMR spectrum (a) and partial 2D ROESY spectrum (b) of butylone - Succ- $\beta$ -CD complex. Further conditions can be found in 3.3. *NMR experiments* section., **Figure S21.** The  $^1\text{H}$  NMR spectrum (a) and  $^1\text{H}$ - $^{13}\text{C}$  HSQC spectrum (b) of mephedrone - Succ- $\beta$ -CD complex. Further conditions can be found in 3.3. *NMR experiments* section., **Figure S22.** The  $^1\text{H}$  NMR spectrum (a) and partial 2D ROESY spectrum (b) of butylone - 6-(SB) $\gamma$ - $\beta$ -CD complex. Further conditions can be found in 3.3. *NMR experiments* section., **Figure S23.** The  $^1\text{H}$  NMR spectrum (a) and partial 2D ROESY spectrum (b) of mephedrone - 6-(SB) $\gamma$ - $\beta$ -CD complex. Further conditions can be found in 3.3. *NMR experiments* section., **Figure S24.** The  $^1\text{H}$  NMR spectrum (a) and partial 2D ROESY spectrum (b) of butylone - SBX complex. Further conditions can be found in 3.3. *NMR experiments* section., **Figure S25.** The  $^1\text{H}$  NMR spectrum (a) and partial 2D ROESY spectrum (b) of mephedrone - SBX complex. Further conditions can be found in 3.3. *NMR experiments* section.

**Table S1.** Cathinone-CD complex stability constants ( $M^{-1}$ ) and their mobility values measured by affinity capillary electrophoresis at 30 mM phosphate buffer (pH 7.4), 25°C, 15 kV, 215 nm. In the case of enantioseparation the complex stability constants refers to the first (first row) and the second (third row) migrating enantiomer, and the maximal resolution values ( $R_s$ ) are also indicated with the optimal cyclodextrin concentrations. Further conditions and CD abbreviations can be found in 3.1. *Materials* section.

| Cyclodextrin        |             | Flephedrone     | Mephedrone      | 4-MEC           | Butylone        | MDPV             |
|---------------------|-------------|-----------------|-----------------|-----------------|-----------------|------------------|
| $\alpha$ -CD        | $K_{stab1}$ | $40 \pm 4$      | $30 \pm 4$      | $30 \pm 5$      | $40 \pm 5$      | $40 \pm 6$       |
|                     | $\mu_{AS1}$ | $10.5 \pm 0.8$  | $8.4 \pm 0.6$   | $7.1 \pm 0.7$   | $5.5 \pm 0.7$   | $2.7 \pm 1.0$    |
|                     | $K_{stab2}$ |                 |                 |                 |                 | $50 \pm 5$       |
|                     | $\mu_{AS2}$ |                 |                 |                 |                 | $3.4 \pm 0.7$    |
|                     | $R_s$       |                 |                 |                 |                 | 0.6 (30 mM)      |
| $\beta$ -CD         | $K_{stab1}$ | $350 \pm 60$    | $560 \pm 50$    | $390 \pm 45$    | $500 \pm 50$    | $1\,400 \pm 135$ |
|                     | $\mu_{AS1}$ | $12.5 \pm 0.3$  | $7.4 \pm 0.2$   | $5.3 \pm 0.3$   | $3.5 \pm 0.4$   | $4.6 \pm 0.1$    |
|                     | $K_{stab2}$ |                 |                 |                 | $430 \pm 55$    | $810 \pm 155$    |
|                     | $\mu_{AS2}$ |                 |                 |                 | $2.4 \pm 0.5$   | $3.6 \pm 0.4$    |
|                     | $R_s$       |                 |                 |                 | 0.7 (7 mM)      | 0.8 (8 mM)       |
| $\gamma$ -CD        | $K_{stab}$  | $125 \pm 10$    | $60 \pm 10$     | $90 \pm 15$     | $30 \pm 3$      | $100 \pm 10$     |
|                     | $\mu_{AS}$  | $13.2 \pm 0.1$  | $9.9 \pm 0.4$   | $9.2 \pm 0.4$   | $2.4 \pm 0.6$   | $5.1 \pm 0.4$    |
| HP- $\beta$ -CD     | $K_{stab}$  | $15 \pm 3$      | $60 \pm 4$      | $80 \pm 5$      | $170 \pm 10$    | $255 \pm 10$     |
|                     | $\mu_{AS}$  | $-5.0 \pm 3.7$  | $1.0 \pm 0.6$   | $2.4 \pm 0.4$   | $2.2 \pm 0.2$   | $2.5 \pm 0.2$    |
| HP- $\gamma$ -CD    | $K_{stab}$  | $220 \pm 35$    | $25 \pm 3$      | $40 \pm 4$      | $40 \pm 5$      | $50 \pm 10$      |
|                     | $\mu_{AS}$  | $15.5 \pm 0.2$  | $10.5 \pm 0.6$  | $11.1 \pm 0.5$  | $8.7 \pm 0.8$   | $6.5 \pm 0.1$    |
| RAME- $\beta$ -CD   | $K_{stab1}$ | $40 \pm 5$      | $100 \pm 5$     | $140 \pm 7$     | $325 \pm 15$    | $585 \pm 35$     |
|                     | $\mu_{AS1}$ | $3.2 \pm 1.4$   | $3.0 \pm 0.4$   | $3.2 \pm 0.3$   | $3.4 \pm 0.1$   | $3.8 \pm 0.1$    |
|                     | $K_{stab2}$ |                 |                 |                 | $350 \pm 15$    |                  |
|                     | $\mu_{AS2}$ |                 |                 |                 | $3.7 \pm 0.1$   |                  |
|                     | $R_s$       |                 |                 |                 | 0.3 (10 mM)     |                  |
| DIME- $\beta$ -CD   | $K_{stab1}$ | $60 \pm 6$      | $150 \pm 15$    | $210 \pm 20$    | $660 \pm 70$    | $1\,820 \pm 190$ |
|                     | $\mu_{AS1}$ | $2.9 \pm 0.5$   | $3.0 \pm 0.4$   | $2.9 \pm 0.3$   | $3.9 \pm 0.2$   | $4.3 \pm 0.2$    |
|                     | $K_{stab2}$ |                 |                 | $270 \pm 25$    |                 |                  |
|                     | $\mu_{AS2}$ |                 |                 | $3.2 \pm 0.3$   |                 |                  |
|                     | $R_s$       |                 |                 | 0.6 (10 mM)     |                 |                  |
| TRIME- $\beta$ -CD  | $K_{stab}$  | $< 10$          | $20 \pm 3$      | $60 \pm 15$     | $20 \pm 2$      | $40 \pm 10$      |
|                     | $\mu_{AS}$  | n.d.            | $8.1 \pm 1.4$   | $11.1 \pm 0.1$  | $2.5 \pm 1.4$   | $9.4 \pm 1.4$    |
| TRIME- $\gamma$ -CD | $K_{stab}$  | $< 10$          | $< 10$          | $20 \pm 4$      | $25 \pm 10$     | $45 \pm 14$      |
|                     | $\mu_{AS}$  | n.d.            | n.d.            | $16.1 \pm 0.2$  | $15.6 \pm 0.2$  | $13.6 \pm 0.6$   |
| Ac- $\beta$ -CD     | $K_{stab1}$ | $100 \pm 14$    | $220 \pm 20$    | $150 \pm 15$    | $290 \pm 30$    | $310 \pm 30$     |
|                     | $\mu_{AS1}$ | $6.8 \pm 1.0$   | $8.5 \pm 0.3$   | $6.2 \pm 0.5$   | $5.8 \pm 0.3$   | $7.4 \pm 0.3$    |
|                     | $K_{stab2}$ |                 |                 |                 | $380 \pm 30$    | $240 \pm 20$     |
|                     | $\mu_{AS2}$ |                 |                 |                 | $5.6 \pm 0.2$   | $6.0 \pm 0.3$    |
|                     | $R_s$       |                 |                 |                 | 0.9 (10 mM)     | 0.8 (10 mM)      |
| CM- $\alpha$ -CD    | $K_{stab1}$ | $75 \pm 9$      | $90 \pm 20$     | $150 \pm 15$    | $110 \pm 12$    | $240 \pm 20$     |
|                     | $\mu_{AS1}$ | $-17.4 \pm 2.7$ | $-23.5 \pm 4.5$ | $-13.9 \pm 1.6$ | $-19.7 \pm 2.7$ | $-21.4 \pm 0.9$  |
|                     | $K_{stab2}$ | $90 \pm 15$     | $110 \pm 20$    | $150 \pm 15$    | $90 \pm 12$     | $340 \pm 20$     |
|                     | $\mu_{AS2}$ | $-15.9 \pm 2.8$ | $-21.7 \pm 3.4$ | $-15.6 \pm 1.3$ | $-28.3 \pm 4.4$ | $-21.9 \pm 0.6$  |
|                     | $R_s$       | 0.9 (5 mM)      | 1.7 (5 mM)      | 1.4 (5 mM)      | 0.6 (5 mM)      | 3.3 (5 mM)       |

|                             |                    |              |             |             |               |               |
|-----------------------------|--------------------|--------------|-------------|-------------|---------------|---------------|
| <b>CM-β-CD</b>              | K <sub>stab1</sub> | 190 ± 10     | 610 ± 30    | 620 ± 40    | 1 500 ± 50    | 1 900 ± 90    |
|                             | μ <sub>AS1</sub>   | -17.7 ± 0.8  | -18.5 ± 0.4 | -18.5 ± 0.5 | -18.7 ± 0.2   | -18.5 ± 0.3   |
|                             | K <sub>stab2</sub> | 225 ± 10     | 615 ± 25    | 725 ± 45    | 1 500 ± 60    | 2 700 ± 150   |
|                             | μ <sub>AS2</sub>   | -16.7 ± 0.6  | -18.5 ± 0.6 | -18.2 ± 0.5 | -18.9 ± 0.3   | -18.8 ± 0.3   |
|                             | R <sub>s</sub>     | 1.3 (10 mM)  | 0.7 (3 mM)  | 0.6 (10 mM) | 0.4 (2 mM)    | 3.3 (10 mM)   |
| <b>CM-γ-CD</b>              | K <sub>stab1</sub> | 50 ± 9       | 50 ± 8      | 65 ± 8      | 140 ± 10      | 160 ± 15      |
|                             | μ <sub>AS1</sub>   | 2.5 ± 1.6    | -11.8 ± 3.5 | -8.1 ± 1.9  | -7.6 ± 0.8    | -9.0 ± 1.0    |
|                             | K <sub>stab2</sub> | 30 ± 5       | 60 ± 10     | 70 ± 10     | 170 ± 10      | 170 ± 17      |
|                             | μ <sub>AS2</sub>   | -9.4 ± 4.6   | -10.5 ± 3.0 | -8.4 ± 2.0  | -6.9 ± 0.5    | -9.0 ± 1.0    |
|                             | R <sub>s</sub>     | 0.7 (8 mM)   | 2.6 (10 mM) | 1.7 (10 mM) | 1.8 (8 mM)    | 1.4 (7 mM)    |
| <b>CE-β-CD</b>              | K <sub>stab1</sub> | 150 ± 10     | 400 ± 30    | 590 ± 40    | 975 ± 95      | 1 560 ± 120   |
|                             | μ <sub>AS1</sub>   | -8.2 ± 0.7   | -13.5 ± 0.6 | -12.2 ± 0.4 | -14.4 ± 0.5   | -14.0 ± 0.3   |
|                             | K <sub>stab2</sub> |              | 430 ± 25    |             |               | 2 000 ± 155   |
|                             | μ <sub>AS2</sub>   |              | -12.9 ± 0.4 |             |               | -14.1 ± 0.3   |
|                             | R <sub>s</sub>     |              | 0.8 (10 mM) |             |               | 1.6 (10 mM)   |
| <b>SAX</b>                  | K <sub>stab1</sub> | 2 000 ± 35   | 530 ± 45    | 5 550 ± 650 | 2 900 ± 200   | 2 550 ± 145   |
|                             | μ <sub>AS1</sub>   | -13.3 ± 0.2  | -16.0 ± 1.0 | -5.1 ± 0.4  | -9.9 ± 0.5    | -18.0 ± 0.3   |
|                             | K <sub>stab2</sub> |              |             |             |               | 2 800 ± 75    |
|                             | μ <sub>AS2</sub>   |              |             |             |               | -20.1 ± 0.6   |
|                             | R <sub>s</sub>     |              |             |             |               | 1.3 (5 mM)    |
| <b>SBX</b>                  | K <sub>stab1</sub> | 575 ± 35     | 5 000 ± 500 | 8 000 ± 340 | 8 250 ± 400   | 9 650 ± 900   |
|                             | μ <sub>AS1</sub>   | -34.9 ± 1.2  | -32.9 ± 0.9 | -32.5 ± 0.4 | -31.6 ± 0.4   | -32.4 ± 0.7   |
|                             | K <sub>stab2</sub> | 610 ± 45     |             |             | 8 750 ± 820   | 12 830 ± 900  |
|                             | μ <sub>AS2</sub>   | -35.0 ± 1.5  |             |             | -31.8 ± 0.7   | -31.4 ± 0.4   |
|                             | R <sub>s</sub>     | 1.0 (3 mM)   |             |             | 0.9 (3 mM)    | 1.6 (3 mM)    |
| <b>SGX</b>                  | K <sub>stab1</sub> | 315 ± 20     | 825 ± 65    | 975 ± 90    | 1 700 ± 110   | 1 500 ± 145   |
|                             | μ <sub>AS1</sub>   | -18.7 ± 1.1  | -32.1 ± 1.4 | -30.7 ± 1.6 | -32.3 ± 1.0   | -33.8 ± 1.3   |
|                             | K <sub>stab2</sub> |              | 1 000 ± 100 | 960 ± 95    |               | 2 000 ± 185   |
|                             | μ <sub>AS2</sub>   |              | -30.6 ± 1.5 | -31.4 ± 1.7 |               | -33.8 ± 1.2   |
|                             | R <sub>s</sub>     |              | 2.5 (4 mM)  | 1.3 (4 mM)  |               | 2.2 (4 mM)    |
| <b>Succ-β-CD<br/>(DS~6)</b> | K <sub>stab1</sub> | 1 600 ± 230  | 1 900 ± 200 | 4 500 ± 680 | 5 200 ± 645   | 5 600 ± 175   |
|                             | μ <sub>AS1</sub>   | 9.2 ± 0.7    | -13.2 ± 1.6 | -3.9 ± 1.2  | -15.1 ± 1.3   | -16.4 ± 0.4   |
|                             | K <sub>stab2</sub> |              |             |             | 6 200 ± 870   |               |
|                             | μ <sub>AS2</sub>   |              |             |             | -15.0 ± 1.4   |               |
|                             | R <sub>s</sub>     |              |             |             | 1.8 (4 mM)    |               |
| <b>Succ-β-CD<br/>(DS~4)</b> | K <sub>stab1</sub> | 7 200 ± 1000 | 2 750 ± 300 | 8 900 ± 920 | 13 500 ± 1350 | 12 100 ± 2150 |
|                             | μ <sub>AS1</sub>   | -5.7 ± 0.4   | -16.2 ± 0.6 | -12.7 ± 0.4 | -19.0 ± 0.4   | -23.2 ± 1.1   |
|                             | K <sub>stab2</sub> |              |             | 8 200 ± 880 | 30 500 ± 5300 | 10 600 ± 35   |
|                             | μ <sub>AS2</sub>   |              |             | -13.6 ± 0.5 | -19.1 ± 0.4   | -24.1 ± 0.1   |
|                             | R <sub>s</sub>     |              |             | 1.1 (2 mM)  | 1.3 (1.5 mM)  | 2.5 (2 mM)    |
| <b>Phos-β-CD</b>            | K <sub>stab1</sub> | 330 ± 20     | 1 900 ± 200 | 1 200 ± 85  | 1 400 ± 130   | 870 ± 60      |
|                             | μ <sub>AS1</sub>   | -25.5 ± 0.9  | -27.0 ± 0.7 | -26.6 ± 0.7 | -27.4 ± 1.1   | -30.2 ± 1.3   |
|                             | K <sub>stab2</sub> | 440 ± 35     | 2 100 ± 230 | 1 400 ± 120 | 1 600 ± 140   | 1 200 ± 85    |
|                             | μ <sub>AS2</sub>   | -25.8 ± 1.2  | -27.0 ± 0.7 | -26.6 ± 0.7 | -27.3 ± 0.9   | -29.3 ± 1.1   |
|                             | R <sub>s</sub>     | 4.0 (10 mM)  | 1.8 (10 mM) | 1.4 (8 mM)  | 1.7 (10 mM)   | 2.6 (3 mM)    |
| <b>SBE-α-CD</b>             | K <sub>stab1</sub> | n.d.         | 430 ± 70    | 450 ± 45    | 220 ± 20      | 580 ± 80      |
|                             | μ <sub>AS1</sub>   | n.d.         | -18.3 ± 2.4 | -17.9 ± 1.0 | -31.9 ± 3.3   | -18.2 ± 1.6   |
|                             | K <sub>stab2</sub> | n.d.         | 565 ± 80    | 610 ± 55    | 530 ± 100     | 550 ± 90      |
|                             | μ <sub>AS2</sub>   | n.d.         | -16.9 ± 1.7 | -17.5 ± 0.8 | -13.5 ± 3.4   | -20.1 ± 2.2   |
|                             | R <sub>s</sub>     |              | 2.5 (7 mM)  | 2.1 (8 mM)  | 1.1 (1.5 mM)  | 0.5 (3 mM)    |

|                              |             |                     |                      |                      |                      |                       |
|------------------------------|-------------|---------------------|----------------------|----------------------|----------------------|-----------------------|
| <b>SBE-β-CD<br/>(DS~4)</b>   | $K_{stab1}$ | $175 \pm 25$        | $300 \pm 60$         | $560 \pm 60$         | $1\,600 \pm 280$     | $3\,400 \pm 45$       |
|                              | $\mu_{AS1}$ | $-13.6 \pm 2.4$     | $-25.3 \pm 3.9$      | $-18.0 \pm 1.1$      | $-17.5 \pm 1.1$      | $-17.5 \pm 0.1$       |
|                              | $K_{stab2}$ |                     | $325 \pm 60$         | $550 \pm 40$         |                      |                       |
|                              | $\mu_{AS2}$ |                     | $-25.9 \pm 3.6$      | $-18.3 \pm 0.8$      |                      |                       |
|                              | $R_s$       |                     | $0.7\text{ (5 mM)}$  | $0.8\text{ (5 mM)}$  |                      |                       |
| <b>SBE-β-CD<br/>(DS~6.5)</b> | $K_{stab1}$ | $200 \pm 20$        | $500 \pm 20$         | $560 \pm 35$         | $1\,200 \pm 60$      | $2\,300 \pm 140$      |
|                              | $\mu_{AS1}$ | $-17.1 \pm 1.3$     | $-24.3 \pm 0.4$      | $-24.8 \pm 0.7$      | $-25.3 \pm 0.4$      | $-26.3 \pm 0.4$       |
|                              | $K_{stab2}$ | $200 \pm 12$        | $500 \pm 40$         | $660 \pm 35$         | $1\,300 \pm 60$      | $2\,550 \pm 200$      |
|                              | $\mu_{AS2}$ | $-18.1 \pm 0.8$     | $-24.7 \pm 0.8$      | $-24.2 \pm 0.5$      | $-25.6 \pm 0.4$      | $-27.0 \pm 0.5$       |
|                              | $R_s$       | $1.0\text{ (8 mM)}$ | $0.6\text{ (8 mM)}$  | $1.4\text{ (8 mM)}$  | $0.7\text{ (8 mM)}$  | $1.1\text{ (8 mM)}$   |
| <b>SBE-γ-CD</b>              | $K_{stab1}$ | $100 \pm 5$         | $70 \pm 15$          | $< 10$               | $95 \pm 15$          | $160 \pm 20$          |
|                              | $\mu_{AS1}$ | $7.2 \pm 0.3$       | $-5.4 \pm 3.0$       | n.d.                 | $-10.0 \pm 2.3$      | $-11.6 \pm 1.7$       |
|                              | $K_{stab2}$ |                     | $65 \pm 12$          |                      | $100 \pm 15$         |                       |
|                              | $\mu_{AS2}$ |                     | $-8.7 \pm 3.3$       |                      | $-11.3 \pm 2.3$      |                       |
|                              | $R_s$       |                     | $0.5\text{ (7 mM)}$  |                      | $0.6\text{ (7 mM)}$  |                       |
| <b>SP-α-CD</b>               | $K_{stab1}$ | $< 10$              | $50 \pm 12$          | $200 \pm 25$         | $180 \pm 30$         | $130 \pm 35$          |
|                              | $\mu_{AS1}$ | n.d.                | $-27.9 \pm 7.8$      | $-4.8 \pm 1.3$       | $-3.5 \pm 1.7$       | $-13.2 \pm 4.5$       |
|                              | $K_{stab2}$ |                     | $100 \pm 10$         | $125 \pm 20$         | $90 \pm 15$          | $180 \pm 25$          |
|                              | $\mu_{AS2}$ |                     | $-13.3 \pm 1.7$      | $-12.6 \pm 2.5$      | $-15.4 \pm 3.9$      | $-12.6 \pm 2.0$       |
|                              | $R_s$       |                     | $0.4\text{ (5 mM)}$  | $0.5\text{ (7 mM)}$  | $0.6\text{ (5 mM)}$  | $1.3\text{ (5 mM)}$   |
| <b>SP-β-CD<br/>(DS~2)</b>    | $K_{stab1}$ | $140 \pm 12$        | $390 \pm 20$         | $440 \pm 25$         | $710 \pm 45$         | $1\,100 \pm 60$       |
|                              | $\mu_{AS1}$ | $-9.2 \pm 0.5$      | $-9.2 \pm 0.5$       | $-9.8 \pm 0.5$       | $-13.0 \pm 0.5$      | $-13.8 \pm 0.3$       |
|                              | $K_{stab2}$ |                     |                      |                      |                      | $1\,220 \pm 50$       |
|                              | $\mu_{AS2}$ |                     |                      |                      |                      | $-13.4 \pm 0.2$       |
|                              | $R_s$       |                     |                      |                      |                      | $0.6\text{ (0.8 mM)}$ |
| <b>SP-β-CD<br/>(DS~4)</b>    | $K_{stab1}$ | $120 \pm 12$        | $500 \pm 65$         | $620 \pm 65$         | $1\,350 \pm 130$     | $3\,400 \pm 60$       |
|                              | $\mu_{AS1}$ | $-24.6 \pm 2.3$     | $-21.6 \pm 1.2$      | $-23.2 \pm 1.1$      | $-23.8 \pm 1.0$      | $-22.4 \pm 0.1$       |
|                              | $K_{stab2}$ |                     | $450 \pm 65$         |                      |                      |                       |
|                              | $\mu_{AS2}$ |                     | $-22.7 \pm 1.4$      |                      |                      |                       |
|                              | $R_s$       |                     | $0.5\text{ (7 mM)}$  |                      |                      |                       |
| <b>SP-γ-CD</b>               | $K_{stab}$  | $< 10$              | $45 \pm 4$           | $70 \pm 10$          | $70 \pm 10$          | $140 \pm 20$          |
|                              | $\mu_{AS}$  | n.d.                | $0.7 \pm 0.5$        | $2.2 \pm 0.5$        | $-1.1 \pm 0.9$       | $-0.3 \pm 0.5$        |
| <b>SHP-β-CD</b>              | $K_{stab1}$ | $60 \pm 10$         | $230 \pm 20$         | $250 \pm 20$         | $620 \pm 35$         | $800 \pm 65$          |
|                              | $\mu_{AS1}$ | $-14.8 \pm 3.4$     | $-11.4 \pm 0.8$      | $-11.2 \pm 0.9$      | $-11.6 \pm 0.3$      | $-12.0 \pm 0.4$       |
|                              | $K_{stab2}$ |                     | $300 \pm 20$         | $300 \pm 25$         |                      | $910 \pm 55$          |
|                              | $\mu_{AS2}$ |                     | $-9.8 \pm 0.6$       | $-9.9 \pm 0.7$       |                      | $-11.6 \pm 0.3$       |
|                              | $R_s$       |                     | $0.6\text{ (3 mM)}$  | $0.5\text{ (3 mM)}$  |                      | $0.7\text{ (7 mM)}$   |
| <b>SHP-γ-CD</b>              | $K_{stab1}$ | $45 \pm 80$         | $15 \pm 5$           | $30 \pm 7$           | $30 \pm 5$           | $80 \pm 10$           |
|                              | $\mu_{AS1}$ | $6.2 \pm 1.4$       | $-23.7 \pm 11.4$     | $-7.3 \pm 4.3$       | $-15.8 \pm 3.5$      | $-7.5 \pm 1.7$        |
|                              | $K_{stab2}$ |                     | $< 10$               | $25 \pm 5$           | $70 \pm 7$           |                       |
|                              | $\mu_{AS2}$ |                     | n.d.                 | $-14.7 \pm 6.6$      | $-5.8 \pm 1.4$       |                       |
|                              | $R_s$       |                     | $0.6\text{ (10 mM)}$ | $0.8\text{ (10 mM)}$ | $0.7\text{ (10 mM)}$ |                       |
| <b>S-β-CD</b>                | $K_{stab1}$ | $860 \pm 100$       | $2\,000 \pm 110$     | $1\,450 \pm 190$     | $2\,160 \pm 260$     | $2\,700 \pm 250$      |
|                              | $\mu_{AS1}$ | $-15.6 \pm 1.0$     | $-25.7 \pm 0.8$      | $-28.9 \pm 1.2$      | $-31.3 \pm 1.6$      | $-33.3 \pm 1.0$       |
|                              | $K_{stab2}$ |                     | $2\,300 \pm 85$      | $1\,350 \pm 75$      |                      |                       |
|                              | $\mu_{AS2}$ |                     | $-27.2 \pm 0.5$      | $-29.2 \pm 0.7$      |                      |                       |
|                              | $R_s$       |                     | $4.8\text{ (2 mM)}$  | $5.0\text{ (3 mM)}$  |                      |                       |
| <b>S-γ-CD</b>                | $K_{stab}$  | n.d.                | $160 \pm 15$         | $290 \pm 30$         | $960 \pm 95$         | $250 \pm 55$          |
|                              | $\mu_{AS}$  | n.d.                | $-4.9 \pm 1.6$       | $0.1 \pm 1.1$        | $8.0 \pm 0.3$        | $-11.6 \pm 4.1$       |

|                    |             |                 |                  |                  |                  |                 |
|--------------------|-------------|-----------------|------------------|------------------|------------------|-----------------|
| <b>HS-β-CD</b>     | $K_{stab1}$ | $580 \pm 14$    | $1\,400 \pm 175$ | n.d.             | n.d.             | n.d.            |
|                    | $\mu_{AS1}$ | $-16.0 \pm 0.3$ | $-25.6 \pm 1.5$  | n.d.             | n.d.             | n.d.            |
|                    | $K_{stab2}$ | $470 \pm 65$    | $1\,800 \pm 25$  |                  |                  |                 |
|                    | $\mu_{AS2}$ | $-25.5 \pm 2.3$ | $-26.7 \pm 0.1$  |                  |                  |                 |
|                    | $R_s$       | 0.7 (3 mM)      | 6.2 (4 mM)       |                  |                  |                 |
| <b>HDAS-β-CD</b>   | $K_{stab1}$ | $110 \pm 37$    | $450 \pm 60$     | $560 \pm 40$     | $725 \pm 20$     | $360 \pm 55$    |
|                    | $\mu_{AS1}$ | $-16.5 \pm 6.5$ | $-37.9 \pm 3.0$  | $-31.2 \pm 1.1$  | $-29.3 \pm 0.3$  | $-23.4 \pm 2.5$ |
|                    | $K_{stab2}$ | $360 \pm 75$    | $730 \pm 40$     | $830 \pm 45$     |                  | $340 \pm 30$    |
|                    | $\mu_{AS2}$ |                 | $-34.7 \pm 0.9$  | $-30.9 \pm 0.7$  |                  | $-27.0 \pm 1.8$ |
|                    | $R_s$       | 2.8 (5 mM)      | 8.6 (5 mM)       | 7.9 (5 mM)       |                  | 2.3 (5 mM)      |
| <b>HxDMS-α-CD</b>  | $K_{stab}$  | $105 \pm 12$    | $270 \pm 110$    | $55 \pm 15$      | $550 \pm 95$     | $220 \pm 30$    |
|                    | $\mu_{AS}$  | $0.8 \pm 1.2$   | $3.7 \pm 3.0$    | $-11.4 \pm 6.4$  | $6.5 \pm 0.8$    | $1.1 \pm 1.1$   |
| <b>HDMS-β-CD</b>   | $K_{stab}$  | n.d.            | n.d.             | $1\,670 \pm 400$ | $1\,750 \pm 800$ | $915 \pm 265$   |
|                    | $\mu_{AS}$  | n.d.            | n.d.             | $9.8 \pm 0.5$    | $9.4 \pm 0.4$    | $6.1 \pm 1.0$   |
| <b>ODMS-γ-CD</b>   | $K_{stab1}$ | $90 \pm 20$     | $200 \pm 35$     | $110 \pm 15$     | $145 \pm 15$     | $105 \pm 7$     |
|                    | $\mu_{AS1}$ | $-0.5 \pm 2.5$  | $5.4 \pm 1.1$    | $-1.1 \pm 1.6$   | $5.5 \pm 0.6$    | $-6.5 \pm 1.0$  |
|                    | $K_{stab2}$ | $70 \pm 10$     | $140 \pm 20$     | $125 \pm 20$     | $165 \pm 25$     | $110 \pm 45$    |
|                    | $\mu_{AS2}$ | $-7.7 \pm 2.5$  | $2.4 \pm 1.2$    | $-2.4 \pm 1.9$   | $3.1 \pm 1.1$    | $-8.4 \pm 6.2$  |
|                    | $R_s$       | 1.1 (5 mM)      | 2.5 (5 mM)       | 1.7 (5 mM)       | 1.6 (5 mM)       | 0.9 (5 mM)      |
| <b>HMDiSu-β-CD</b> | $K_{stab}$  | n.d.            | n.d.             | $260 \pm 10$     | $265 \pm 20$     | $165 \pm 25$    |
|                    | $\mu_{AS}$  | n.d.            | n.d.             | $-1.1 \pm 0.3$   | $-3.2 \pm 0.7$   | $-9.7 \pm 2.6$  |
| <b>MA-β-CD</b>     | $K_{stab1}$ | $425 \pm 80$    | $225 \pm 35$     | $180 \pm 40$     | $140 \pm 25$     | $350 \pm 60$    |
|                    | $\mu_{AS1}$ | $15.2 \pm 0.2$  | $12.1 \pm 0.3$   | $9.1 \pm 0.7$    | $5.7 \pm 0.8$    | $7.7 \pm 0.4$   |
|                    | $K_{stab2}$ |                 |                  |                  | $340 \pm 50$     | $200 \pm 30$    |
|                    | $\mu_{AS2}$ |                 |                  |                  | $8.0 \pm 0.3$    | $6.7 \pm 0.5$   |
|                    | $R_s$       |                 |                  |                  | 0.5 (5 mM)       | 0.7 (5 mM)      |
| <b>HPA-β-CD</b>    | $K_{stab1}$ | $500 \pm 105$   | $140 \pm 35$     | $145 \pm 15$     | $85 \pm 15$      | $840 \pm 65$    |
|                    | $\mu_{AS1}$ | $16.0 \pm 0.1$  | $11.8 \pm 0.6$   | $10.3 \pm 0.3$   | $3.8 \pm 1.3$    | $11.0 \pm 0.1$  |
|                    | $K_{stab2}$ |                 |                  |                  |                  | $570 \pm 80$    |
|                    | $\mu_{AS2}$ |                 |                  |                  |                  | $9.1 \pm 0.2$   |
|                    | $R_s$       |                 |                  |                  |                  | 0.6 (8 mM)      |
| <b>PYR-β-CD</b>    | $K_{stab1}$ | $640 \pm 145$   | $115 \pm 20$     | $215 \pm 30$     | $1\,280 \pm 170$ | $105 \pm 15$    |
|                    | $\mu_{AS1}$ | $15.1 \pm 0.1$  | $10.6 \pm 0.8$   | $11.3 \pm 0.4$   | $10.8 \pm 0.2$   | $6.2 \pm 0.7$   |
|                    | $K_{stab2}$ |                 |                  |                  |                  | $430 \pm 50$    |
|                    | $\mu_{AS2}$ |                 |                  |                  |                  | $9.1 \pm 0.3$   |
|                    | $R_s$       |                 |                  |                  |                  | 0.5 (5 mM)      |
| <b>PIP-β-CD</b>    | $K_{stab}$  | < 10            | < 10             | < 10             | < 10             | < 10            |
|                    | $\mu_{AS}$  | n.d.            | n.d.             | n.d.             | n.d.             | n.d.            |
| <b>MePIP-β-CD</b>  | $K_{stab}$  | $40 \pm 3$      | $45 \pm 5$       | $50 \pm 5$       | $40 \pm 3$       | $85 \pm 5$      |
|                    | $\mu_{AS}$  | $8.5 \pm 0.2$   | $7.1 \pm 0.4$    | $6.2 \pm 0.3$    | $3.1 \pm 0.4$    | $3.9 \pm 0.3$   |

n.d.: not determined.

**Table S2.** Enantioseparation ( $R_s$ ) of cathinones applying various CDs at 20 mM acetate buffer (pH 4.5), 25°C, 15 kV, 215 nm. Further conditions and CD abbreviations can be found in 3.1. *Materials* section.

| Cyclodextrin        | Concentration (mM) | Flephedrone | Mephedrone | 4-MEC | Butylone | MDPV |
|---------------------|--------------------|-------------|------------|-------|----------|------|
| $\alpha$ -CD        | 1-5                | 0           | 0          | 0     | 0        | 0    |
|                     | 10                 | 0           | 0          | 0.3   | 0        | 0    |
| $\beta$ -CD         | 1                  | 0           | 0          | 0     | 0        | 0.3  |
|                     | 5                  | 0           | 0          | 0     | 0        | 0.8  |
|                     | 10                 | 0           | 0          | 0     | 0        | 0.5  |
| $\gamma$ -CD        | 1-5                | 0           | 0          | 0     | 0        | 0    |
|                     | 10                 | n.d.        | n.d.       | n.d.  | n.d.     | n.d. |
| HP- $\alpha$ -CD    | 1-5                | 0           | 0          | 0     | 0        | 0    |
|                     | 10                 | 0           | 0.3        | 0.6   | 0        | 0.3  |
| HP- $\beta$ -CD     | 1                  | 0           | 0          | 0     | 0        | 0    |
|                     | 5                  | 0           | 0.3        | 0.3   | 0        | 0.5  |
|                     | 10                 | 0           | 0.3        | 0.3   | 0        | 0.4  |
| HP- $\gamma$ -CD    | 1-5-10             | 0           | 0          | 0     | 0        | 0    |
| RAME- $\alpha$ -CD  | 1-5-10             | 0           | 0          | 0     | 0        | 0    |
| RAME- $\beta$ -CD   | 1-5-10             | 0           | 0          | 0     | 0        | 0    |
| RAME- $\gamma$ -CD  | 1-5-10             | 0           | 0          | 0     | 0        | 0    |
| DIME- $\beta$ -CD   | 1                  | 0           | 0          | 0     | 0        | 0    |
|                     | 5                  | 0.8         | 0          | 0     | 0        | 0    |
|                     | 10                 | 0.5         | 0          | 0     | 0        | 0    |
| TRIME- $\alpha$ -CD | 1-5                | 0           | 0          | 0     | 0        | 0    |
|                     | 10                 | 0.6         | 0.7        | 0.8   | 0        | 0    |
| TRIME- $\beta$ -CD  | 1-5-10             | 0           | 0          | 0     | 0        | 0    |
| TRIME- $\gamma$ -CD | 1-5-10             | 0           | 0          | 0     | 0        | 0    |
| CM- $\alpha$ -CD    | 1                  | 0.5         | 0.6        | 0.4   | 0.3      | 1.7  |
|                     | 5                  | 0.9         | 1.7        | 1.5   | 0.5      | 2.9  |
|                     | 10                 | 1.2         | 0.8        | 0.6   | 0.8      | 5.5  |
| CM- $\beta$ -CD     | 1                  | 0.4         | 0          | 0.3   | 0.6      | 1.6  |
|                     | 5                  | 0.8         | 0.1        | 0.4   | 0.3      | 2.1  |
|                     | 10                 | 0.8         | 0.4        | 0.5   | 0.4      | 3.5  |
| CM- $\gamma$ -CD    | 1                  | 0           | 1.1        | 0.7   | 1.2      | 0.9  |
|                     | 5                  | 0.9         | 2.6        | 2.1   | 1.6      | 1.9  |
|                     | 10                 | 0.9         | 2.2        | 1.7   | 1.9      | 0.5  |
| CE- $\beta$ -CD     | 1                  | 0           | 0.1        | 0.2   | 0        | 0    |
|                     | 5                  | 0           | 0          | 0     | 0        | 1.5  |
|                     | 10                 | 0           | 0.2        | 0     | 0        | 1.1  |
| SAX                 | 1                  | 0           | 0          | 0     | 0        | 0.9  |
|                     | 5                  | 0           | n.d.       | n.d.  | 0        | 1.1  |
|                     | 10                 | 0           | n.d.       | n.d.  | 0        | 1.8  |
| SBX                 | 1                  | 0           | 0.4        | 0.5   | 0        | 0    |
|                     | 5                  | 0.5         | 0          | n.d.  | 0.7      | 2.7  |
|                     | 10                 | 0.6         | 0          | 0.8   | 0.9      | 1.9  |
| SGX                 | 1                  | 0           | 0          | 0.4   | 0        | 2.4  |
|                     | 5                  | 0           | 0.8        | 0.9   | 0        | 0    |
|                     | 10                 | 0.6         | 0.7        | 0.9   | 0        | 0    |

|                                                 |           |      |      |      |      |      |
|-------------------------------------------------|-----------|------|------|------|------|------|
| <b>Succ-<math>\beta</math>-CD<br/>(DS~4)</b>    | <b>1</b>  | 0    | 0    | 0.8  | 2.4  | n.d. |
|                                                 | <b>5</b>  | 0.9  | 0    | n.d. | 2.5  | 0.7  |
|                                                 | <b>10</b> | 1.2  | 0    | n.d. | 2.6  | 0.7  |
| <b>SBE-<math>\alpha</math>-CD</b>               | <b>1</b>  | 0.3  | 1.5  | 0.9  | 0.4  | n.d. |
|                                                 | <b>5</b>  | 0.4  | 1.8  | 1.6  | 0.9  | 0.5  |
|                                                 | <b>10</b> | 0.5  | 2.3  | 2.2  | 1.5  | 0.8  |
| <b>SBE-<math>\beta</math>-CD<br/>(DS~6.5)</b>   | <b>1</b>  | 0.3  | 0.4  | 0.5  | 0.5  | 0.7  |
|                                                 | <b>5</b>  | 0.5  | 0.7  | 1.2  | 0.4  | 1.0  |
|                                                 | <b>10</b> | 0.4  | 0.8  | 1.5  | 0.6  | 1.4  |
| <b>SBE-<math>\gamma</math>-CD</b>               | <b>1</b>  | 0    | 0    | 0    | 0    | 0    |
|                                                 | <b>5</b>  | 0    | 1.1  | 1.1  | 0.5  | 0.6  |
|                                                 | <b>10</b> | 0    | 0.9  | 1.1  | 0.8  | 0    |
| <b>6-(SB)<sub>7</sub>-<math>\beta</math>-CD</b> | <b>1</b>  | 0    | 0    | 0    | n.d. | 1.8  |
|                                                 | <b>5</b>  | 0    | 0.2  | 0.7  | 0.4  | 2.6  |
|                                                 | <b>10</b> | 0    | 0.2  | 0.6  | 0.6  | n.d. |
| <b>SP-<math>\beta</math>-CD<br/>(DS~4)</b>      | <b>1</b>  | 0    | 0    | 0    | 0.5  | 0.3  |
|                                                 | <b>5</b>  | 0    | 0.4  | 0.3  | 0.3  | 0.4  |
|                                                 | <b>10</b> | 0    | 0.5  | 0.4  | 0    | 0.6  |
| <b>SP-<math>\gamma</math>-CD</b>                | <b>1</b>  | 0    | 0    | 0    | 0    | 0    |
|                                                 | <b>5</b>  | 0    | 0    | 0    | 0    | 0    |
|                                                 | <b>10</b> | 0    | 0.8  | 0.9  | 0.4  | 0    |
| <b>S-<math>\beta</math>-CD</b>                  | <b>1</b>  | 0.1  | 1.6  | 1.9  | 0.5  | 0.6  |
|                                                 | <b>5</b>  | 0.6  | 3.1  | 4.2  | n.d. | n.d. |
|                                                 | <b>10</b> | 0.9  | n.d. | n.d. | n.d. | n.d. |
| <b>S-<math>\gamma</math>-CD</b>                 | <b>1</b>  | 0    | 0.7  | 0.5  | 0.6  | 0    |
|                                                 | <b>5</b>  | 0    | 1.1  | 0.6  | 0.7  | 1.1  |
|                                                 | <b>10</b> | 0    | 1.0  | 0    | 1.4  | 1.5  |
| <b>HS-<math>\beta</math>-CD</b>                 | <b>1</b>  | 3.1  | 2.9  | 2.4  | 3.4  | 3.4  |
|                                                 | <b>5</b>  | 8.1  | 9.2  | 8.7  | 9.2  | 11.7 |
|                                                 | <b>10</b> | n.d. | n.d. | n.d. | n.d. | n.d. |
| <b>HDAS-<math>\beta</math>-CD</b>               | <b>1</b>  | 5.1  | 2.1  | 2.7  | 3.7  | 1.4  |
|                                                 | <b>5</b>  | 13.1 | 6.2  | 7.3  | 9.5  | 6.1  |
|                                                 | <b>10</b> | 8.0  | 8.4  | 7.7  | 11.4 | 8.5  |
| <b>HDMS-<math>\beta</math>-CD</b>               | <b>1</b>  | 0.8  | 0.2  | 0.3  | 0.8  | 0.5  |
|                                                 | <b>5</b>  | 1.7  | 1.6  | 1.5  | 2.7  | 1.9  |
|                                                 | <b>10</b> | 2.6  | 2.3  | 2.1  | 4.0  | 2.9  |
| <b>ODMS-<math>\gamma</math>-CD</b>              | <b>1</b>  | 0.8  | 2.2  | 1.5  | 1.1  | 0    |
|                                                 | <b>5</b>  | 2.2  | 5.4  | 4.0  | 2.9  | 1.5  |
|                                                 | <b>10</b> | 3.3  | 7.5  | 5.8  | 4.4  | 2.7  |
| <b>HMDiSu-<math>\beta</math>-CD1-5-10</b>       |           | 0    | 0    | 0    | 0    | 0    |

n.d.: not determined.

**Table S3.** Cathinone-CD complex stability constants ( $M^{-1}$ ) and complex mobilities ( $10^{-5} \text{ cm}^{-2} \text{ V}^{-1} \text{ s}^{-1}$ ) measured by affinity capillary electrophoresis at 20 mM acetate buffer (pH 4.5), 25C, 15 kV, 215 nm. The complex stability constants refer to the first ( $K_{\text{stab1}}$ ) and the second ( $K_{\text{stab2}}$ ) migrating enantiomer. Further conditions and CD abbreviations can be found in 3.1. *Materials* section.

| Cyclodextrin      |                    | Flephedrone     | Mephedrone       | 4-MEC            | Butylone         | MDPV            |
|-------------------|--------------------|-----------------|------------------|------------------|------------------|-----------------|
| HS- $\beta$ -CD   | $K_{\text{stab1}}$ | $635 \pm 35$    | $2\,000 \pm 145$ | $2\,100 \pm 80$  | $1\,020 \pm 90$  | $500 \pm 45$    |
|                   | $\mu_{\text{AS1}}$ | $-23.7 \pm 0.8$ | $-31.9 \pm 1.3$  | $-30.5 \pm 0.7$  | $-29.7 \pm 1.8$  | $-35.7 \pm 2.0$ |
|                   | $K_{\text{stab2}}$ | $615 \pm 30$    | $2\,070 \pm 130$ | $1\,410 \pm 80$  | $1\,800 \pm 90$  | $1\,300 \pm 40$ |
|                   | $\mu_{\text{AS2}}$ | $-30.4 \pm 1.0$ | $-36.8 \pm 1.4$  | $-40.9 \pm 1.5$  | $-28.1 \pm 0.9$  | $-27.8 \pm 0.6$ |
| HDAS- $\beta$ -CD | $K_{\text{stab1}}$ | $470 \pm 40$    | $2\,400 \pm 220$ | $1\,400 \pm 145$ | $1\,200 \pm 40$  | $800 \pm 50$    |
|                   | $\mu_{\text{AS1}}$ | $-11.2 \pm 1.2$ | $-12.2 \pm 0.6$  | $-28.0 \pm 2.3$  | $-26.1 \pm 0.5$  | $-24.0 \pm 0.9$ |
|                   | $K_{\text{stab2}}$ | $660 \pm 55$    | $1\,500 \pm 140$ | $2\,100 \pm 140$ | $2\,000 \pm 100$ | $960 \pm 80$    |
|                   | $\mu_{\text{AS2}}$ | $-19.9 \pm 1.3$ | $-17.9 \pm 0.8$  | $-30.9 \pm 1.3$  | $-22.8 \pm 0.5$  | $-24.3 \pm 1.1$ |
| HDMS- $\beta$ -CD | $K_{\text{stab1}}$ | $250 \pm 7$     | $205 \pm 20$     | $170 \pm 15$     | $150 \pm 10$     | $160 \pm 15$    |
|                   | $\mu_{\text{AS1}}$ | $2.6 \pm 0.3$   | $-2.0 \pm 1.3$   | $-3.0 \pm 1.0$   | $-5.9 \pm 0.9$   | $-4.8 \pm 1.8$  |
|                   | $K_{\text{stab2}}$ | $235 \pm 20$    | $205 \pm 15$     | $190 \pm 15$     | $180 \pm 12$     | $175 \pm 12$    |
|                   | $\mu_{\text{AS2}}$ | $-0.4 \pm 1.2$  | $-3.0 \pm 0.8$   | $-3.0 \pm 0.9$   | $-5.9 \pm 1.0$   | $-5.7 \pm 1.0$  |

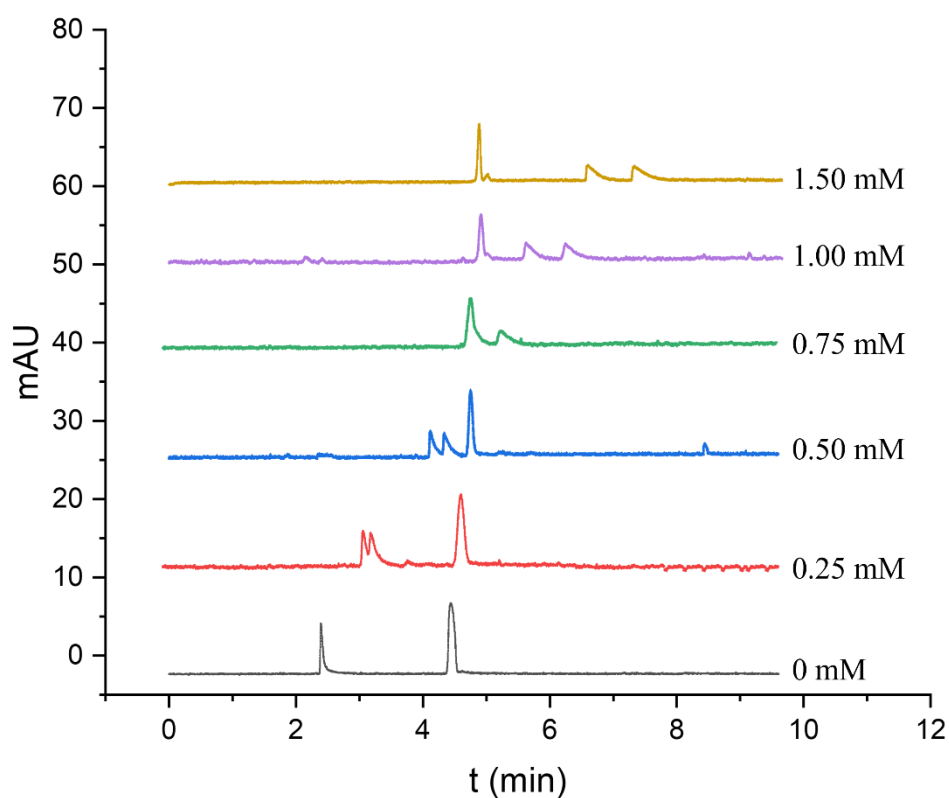

**Figure S1.** Representative electropherograms of 4-MEC – S- $\beta$ -CD complexes in the presence of increasing CD concentration. Further conditions and CD abbreviations can be found in 3.2. *Capillary electrophoresis* and 3.1. *Materials* section.



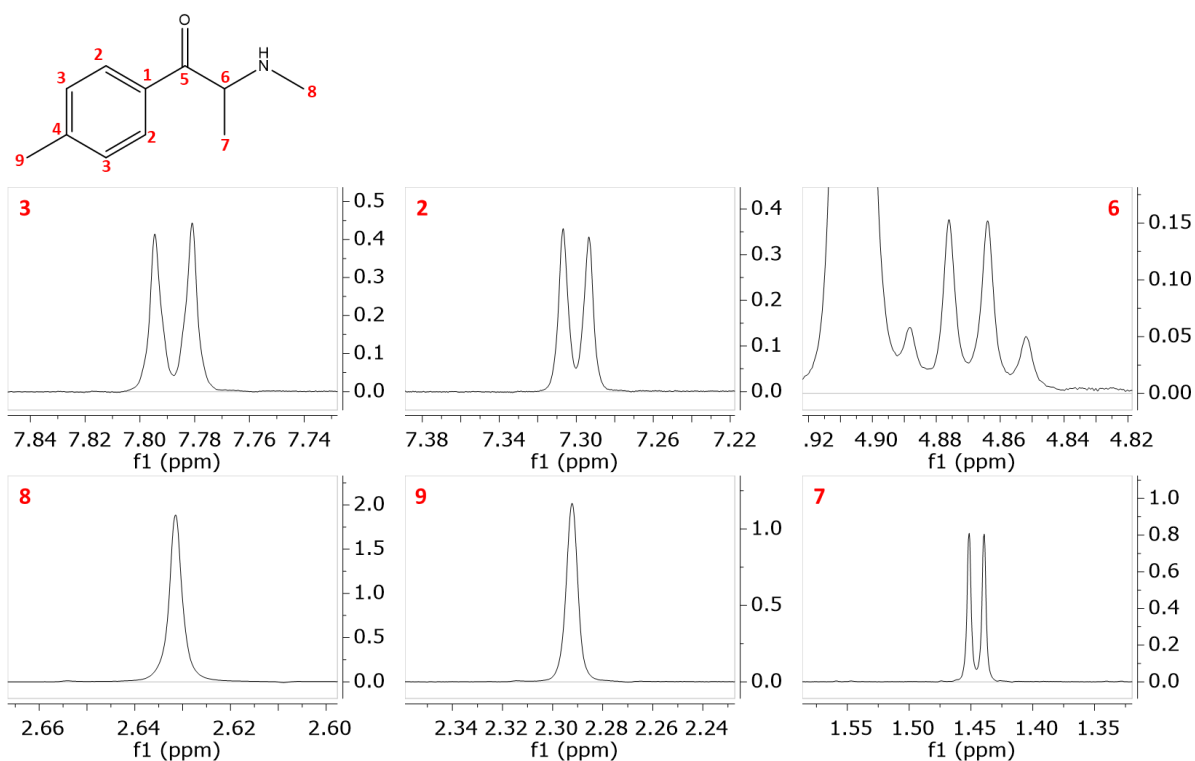

**Figure S2.** Selected <sup>1</sup>H NMR resonances of mephedrone in a 1:1 native  $\beta$ -CD:mephedrone system indicating no diastereotopic splitting (600 MHz, 298 K, D<sub>2</sub>O). Further conditions can be found in 3.3 NMR experiments section.

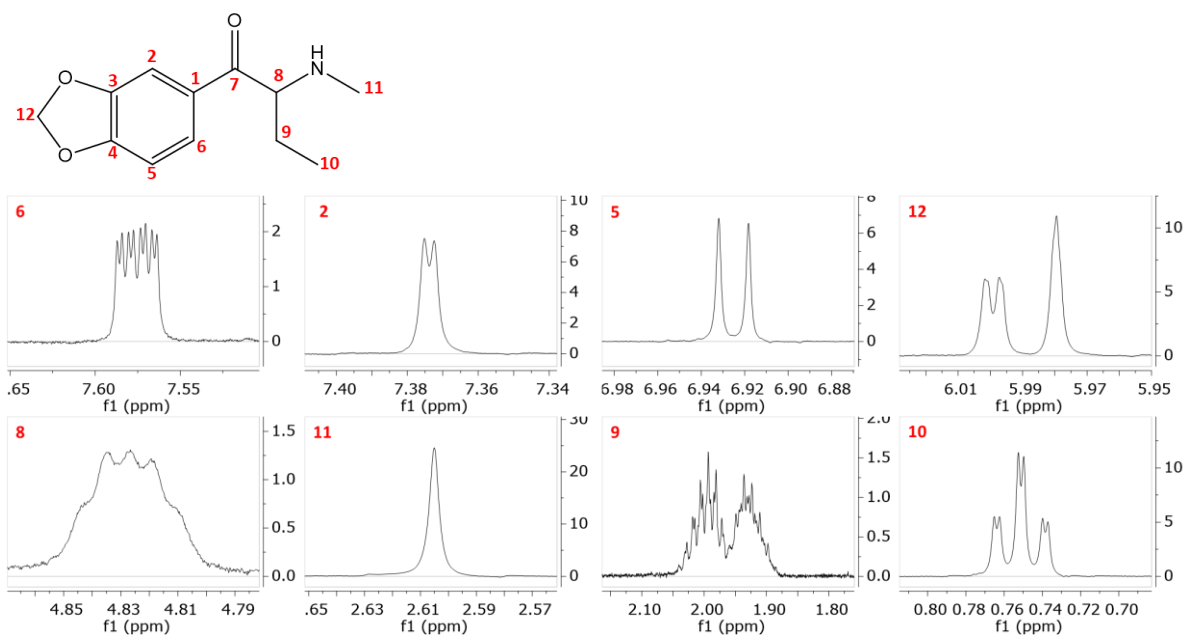

**Figure S3.** Selected <sup>1</sup>H NMR resonances of butylone in a 1:1 native  $\beta$ -CD:butylone system indicating diastereotopic splitting due to the presence of the chiral selector  $\beta$ -CD (600 MHz, 298 K, D<sub>2</sub>O). Further conditions can be found in 3.3 NMR experiments section.

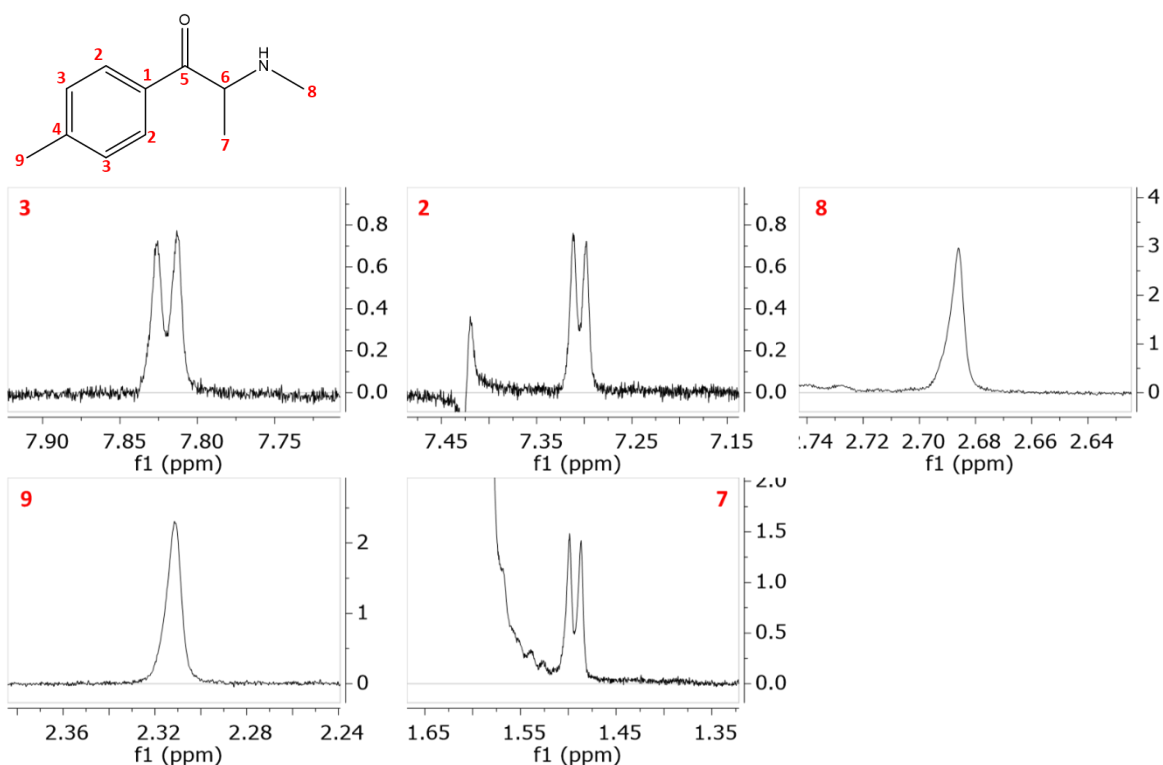

**Figure S4.** Selected <sup>1</sup>H NMR resonances of mephedrone in a 2:1 6-(SB)- $\gamma$ -CD:mephedrone system indicating no enantiomeric recognition (600 MHz, 298 K, D<sub>2</sub>O). Further conditions can be found in 3.3 *NMR experiments* section.

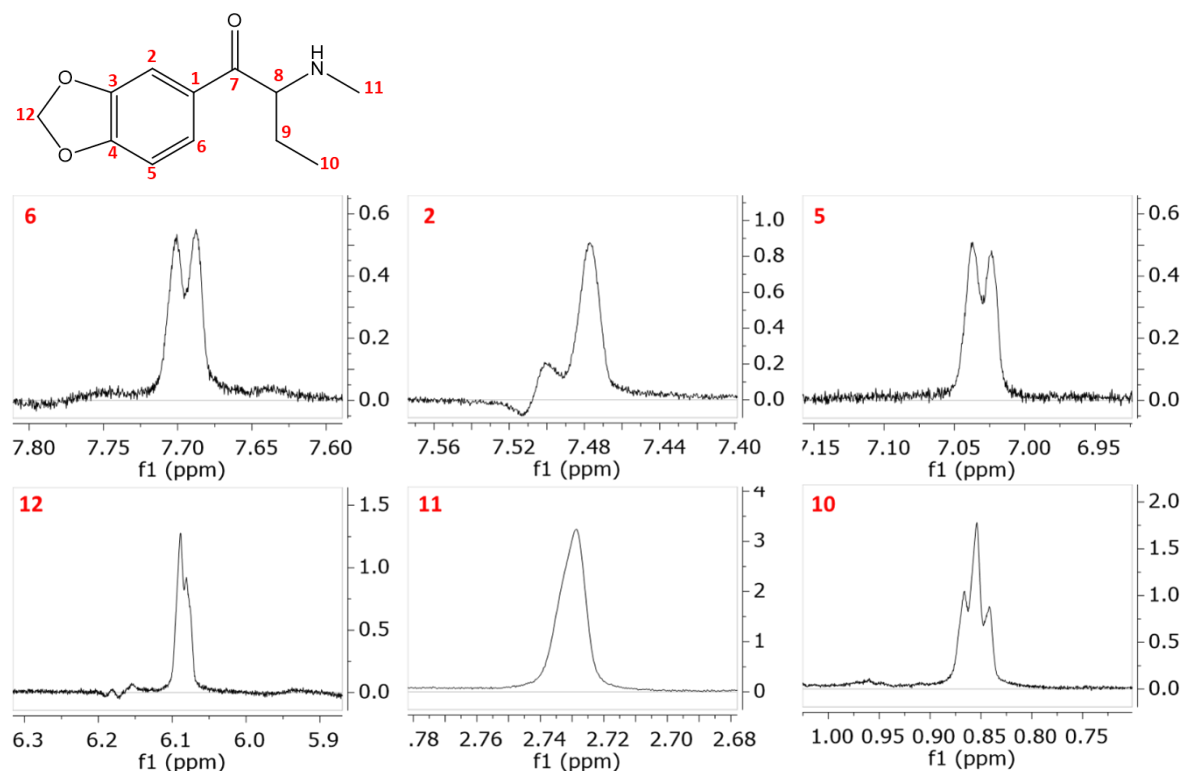

**Figure S5.** Selected <sup>1</sup>H NMR resonances of butylone in a 2:1 6-(SB)- $\gamma$ -CD:butylone system indicating enantiomeric recognition due to the presence of the chiral selector 6-(SB)- $\gamma$ -CD (600 MHz, 298 K, D<sub>2</sub>O). Further conditions can be found in 3.3 *NMR experiments* section.

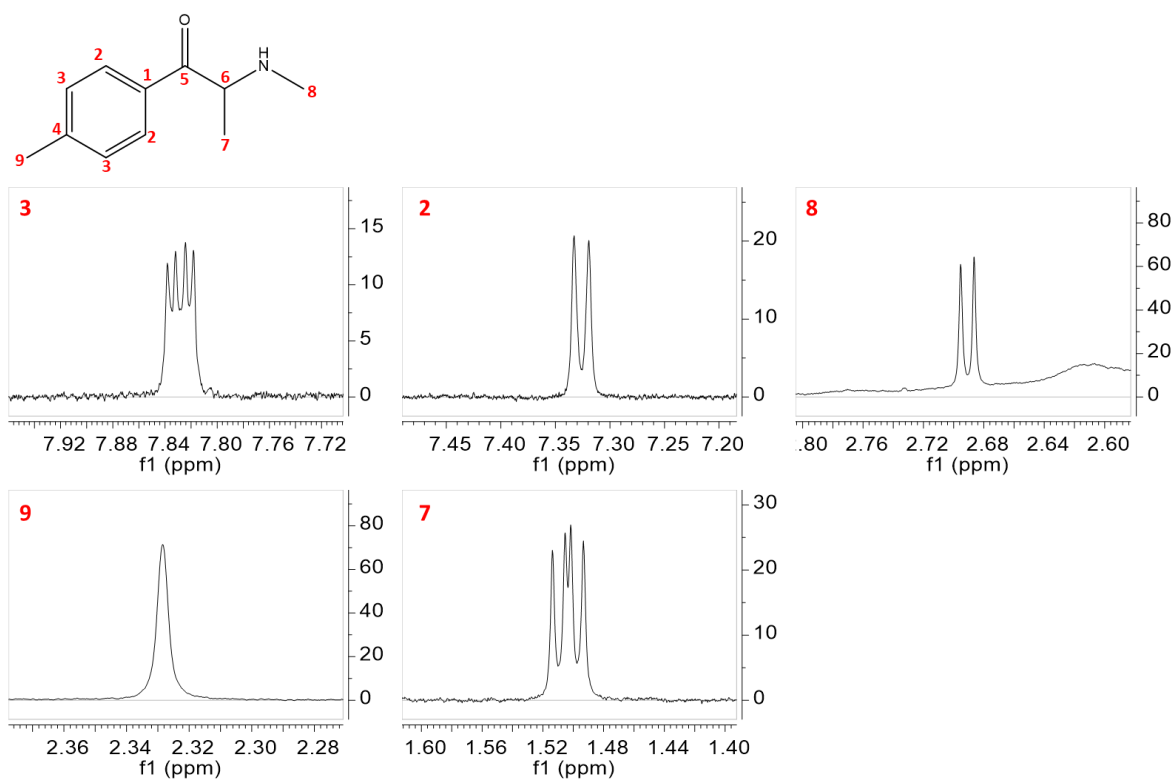

**Figure S6.** Selected  $^1\text{H}$  NMR resonances of mephedrone in a 2:1 Succ- $\beta$ -CD:mephedrone system indicating enantiomeric recognition due to the presence of the chiral selector Succ- $\beta$ -CD (600 MHz, 298 K,  $\text{D}_2\text{O}$ ). Further conditions can be found in 3.3 NMR experiments section.

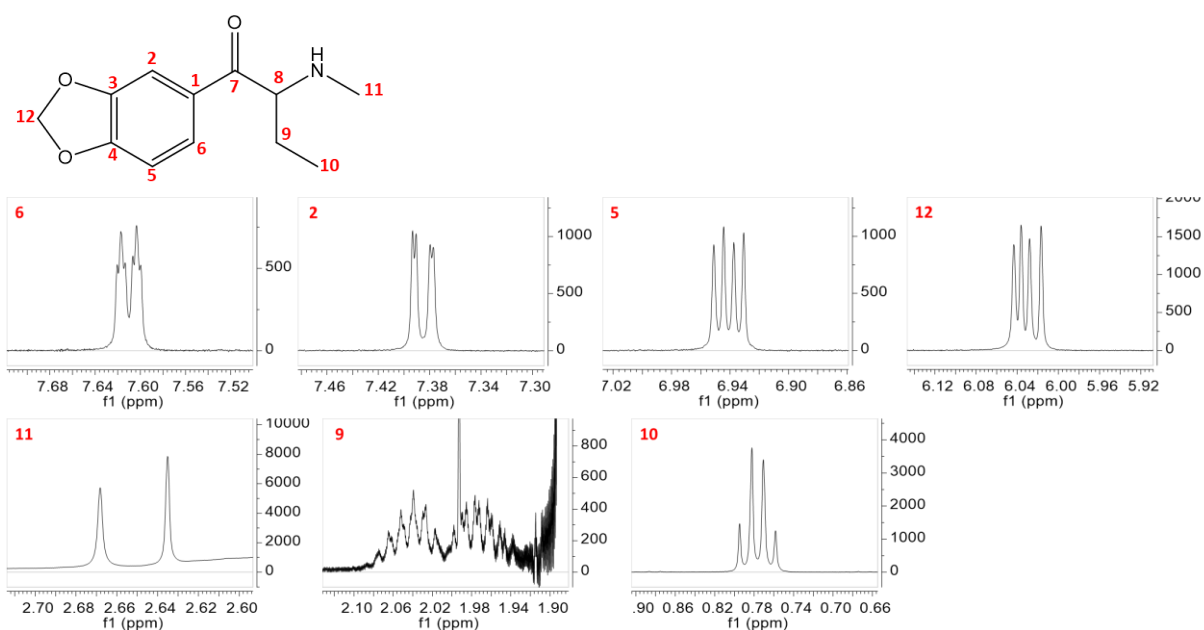

**Figure S7.** Selected  $^1\text{H}$  NMR resonances of butylone in a 2:1 Succ- $\beta$ -CD:butylone system indicating enantiomeric recognition due to the presence of the chiral selector Succ- $\beta$ -CD (600 MHz, 298 K,  $\text{D}_2\text{O}$ ). Further conditions can be found in 3.3 NMR experiments section.

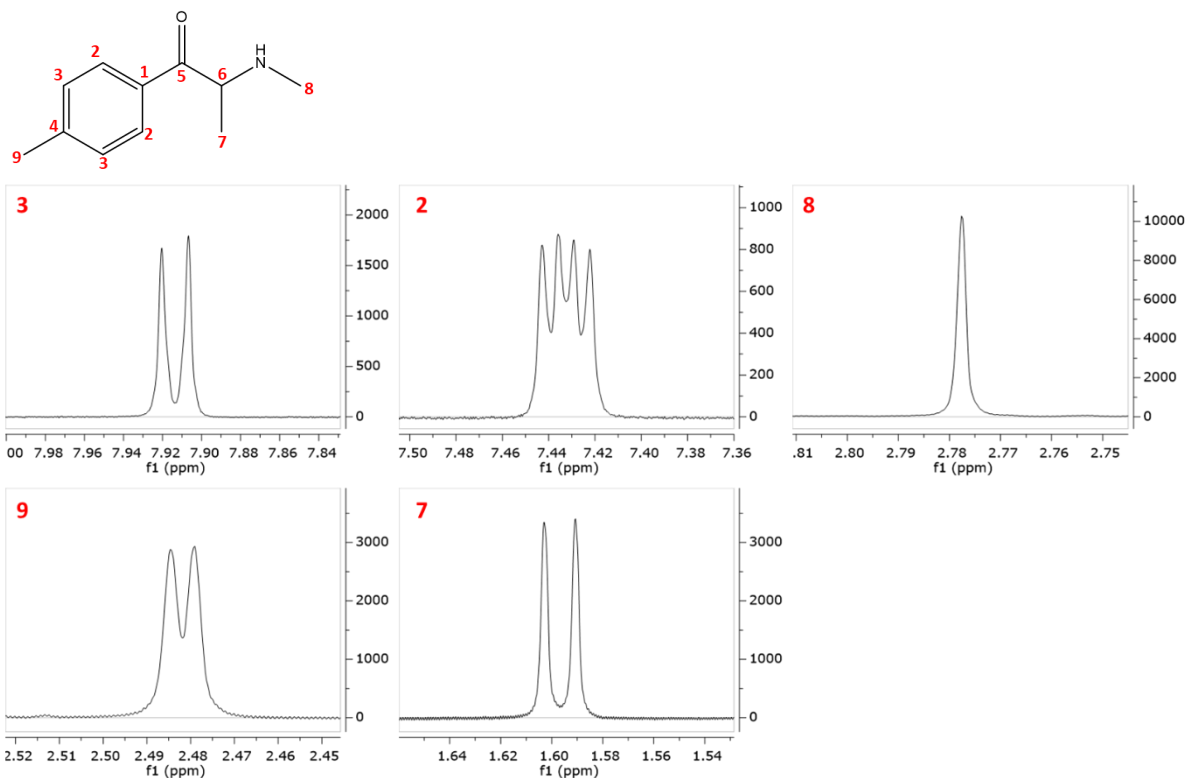

**Figure S8.** Selected  $^1\text{H}$  NMR resonances of mephedrone in a 2:1 SBX:mephedrone system indicating no enantiomeric recognition (600 MHz, 298 K,  $\text{D}_2\text{O}$ ) Further conditions can be found in 3.3 *NMR experiments* section.

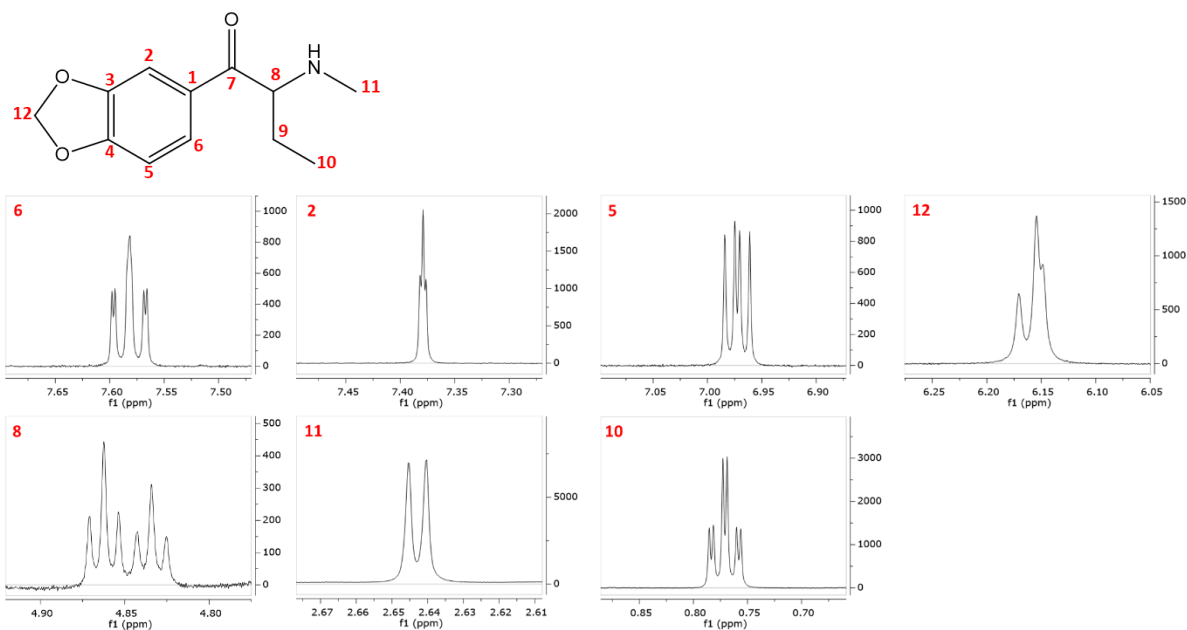

**Figure S9.** Selected  $^1\text{H}$  NMR resonances of butylone in a 2:1 SBX:butylone system indicating enantiomeric recognition due to the presence of the chiral selector SBX (600 MHz, 298 K,  $\text{D}_2\text{O}$ ). As presaturation was applied to diminish the water resonance, the nearby signals exhibit distortion integrals (see e.g. H8). Further conditions can be found in 3.3 *NMR experiments* section.

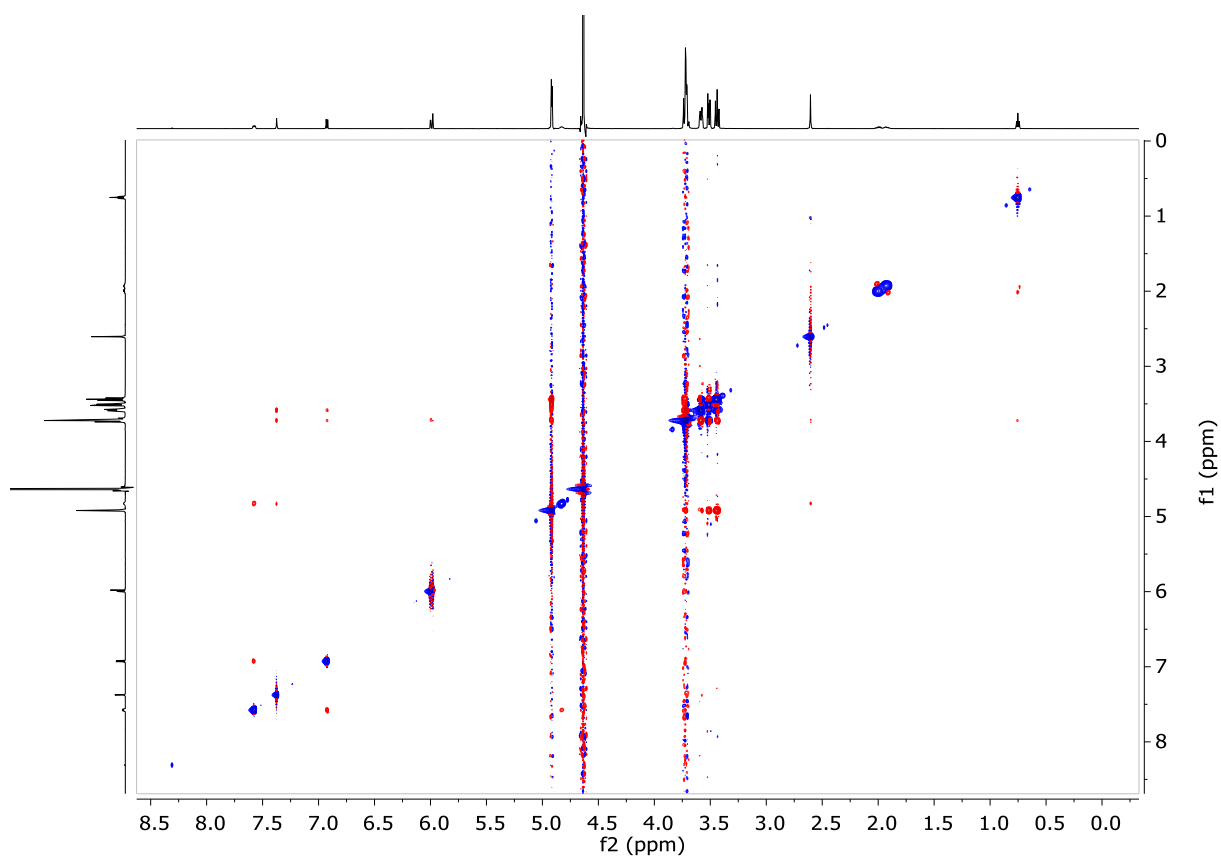

**Figure S10.** The 2D ROESY spectrum of butylone -  $\beta$ -CD complex. Further conditions can be found in 3.3. *NMR experiments* section.

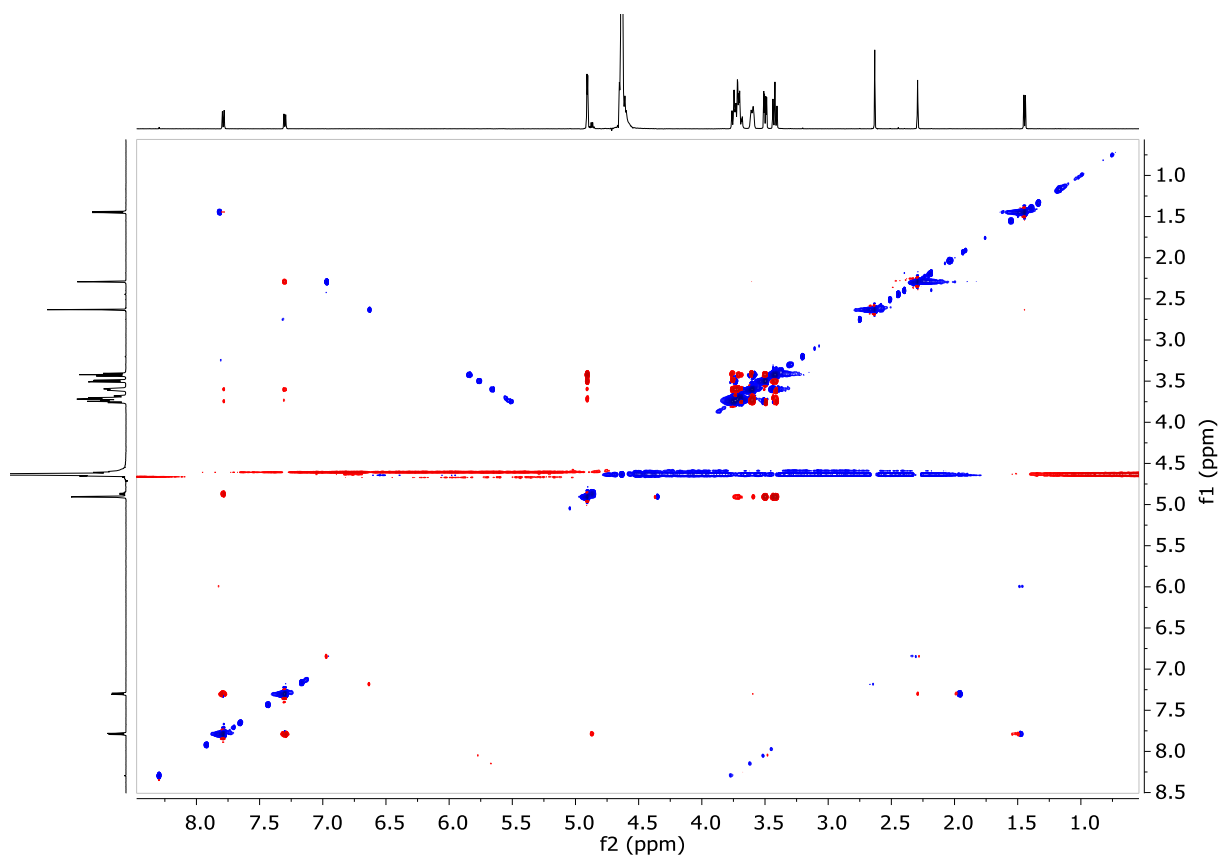

**Figure S11.** The 2D ROESY spectrum of mephedrone -  $\beta$ -CD complex. Further conditions can be found in 3.3. *NMR experiments* section.

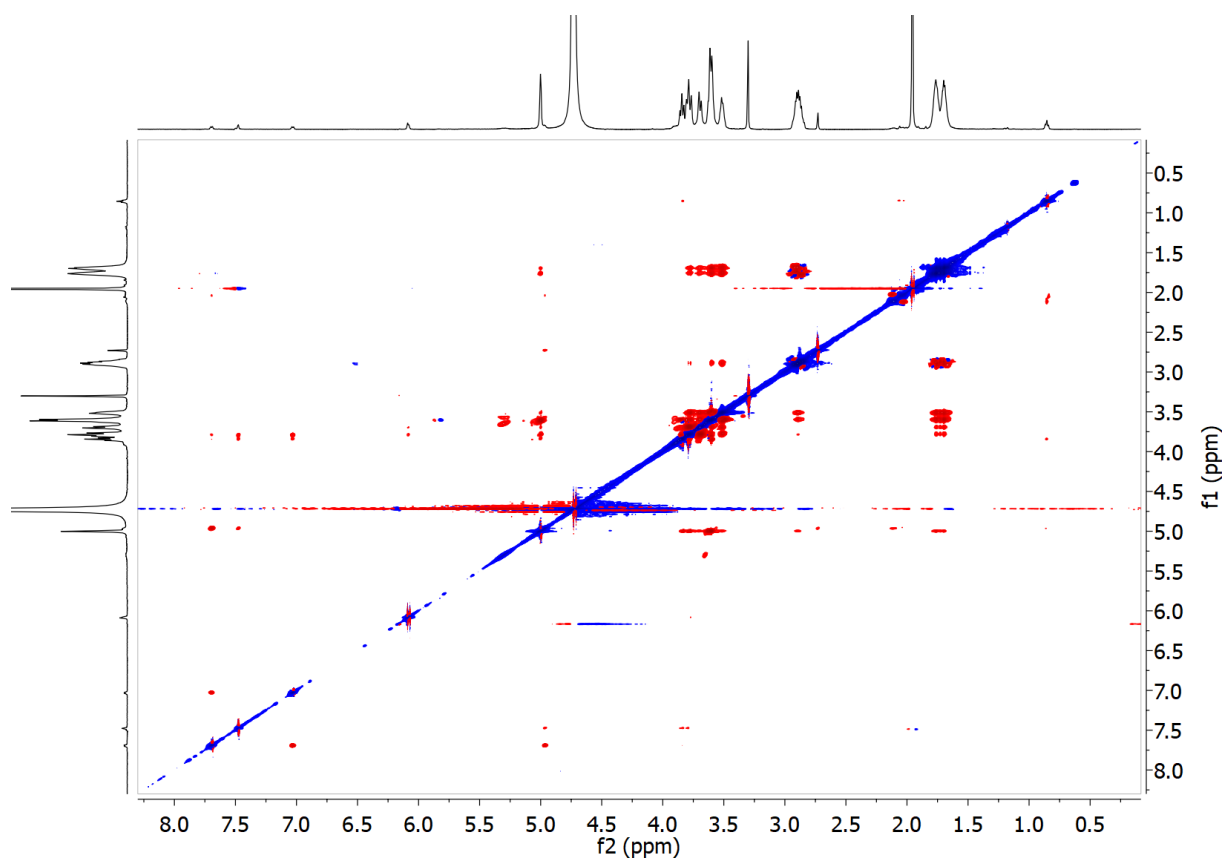

**Figure S12.** The 2D ROESY spectrum of butylone - Succ- $\beta$ -CD complex. Further conditions can be found in 3.3. *NMR experiments* section.

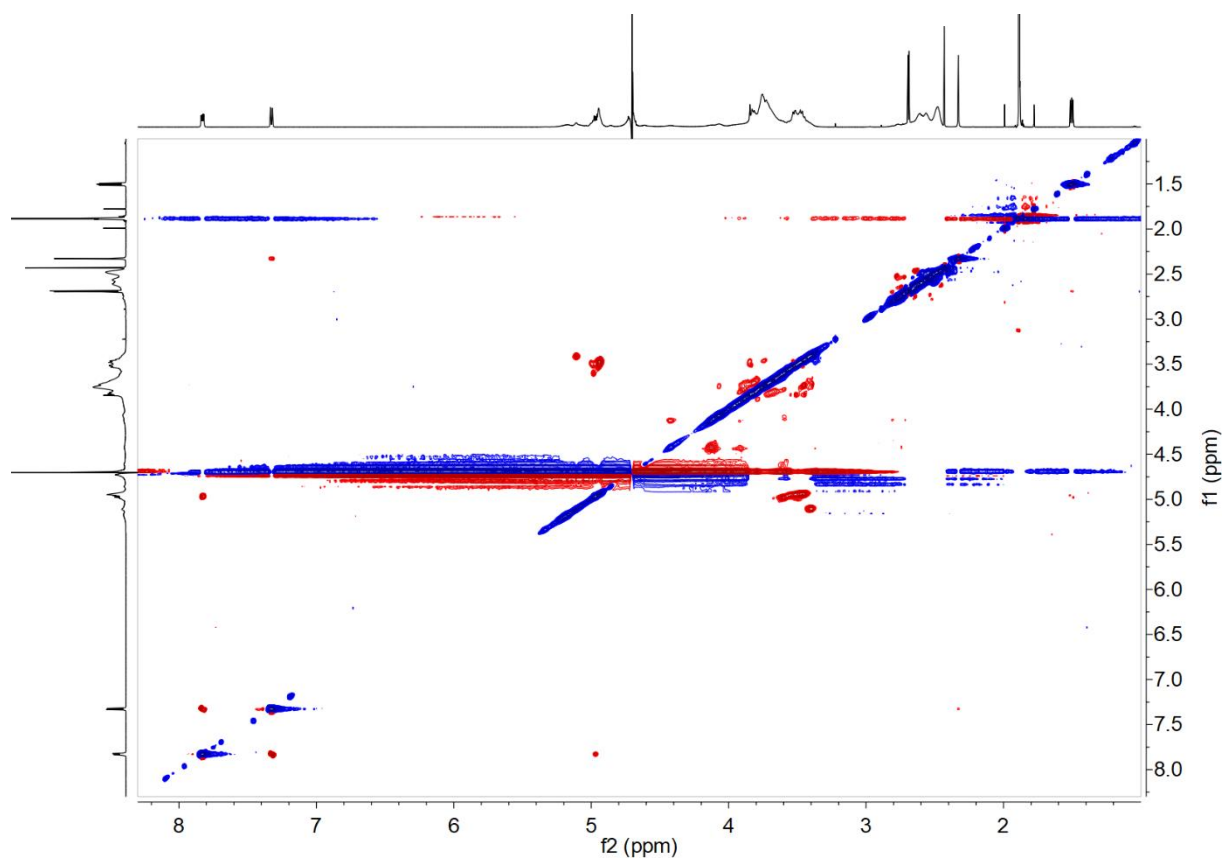

**Figure S13.** The 2D ROESY spectrum of mephedrone - Succ- $\beta$ -CD complex. Further conditions can be found in 3.3. *NMR experiments* section.

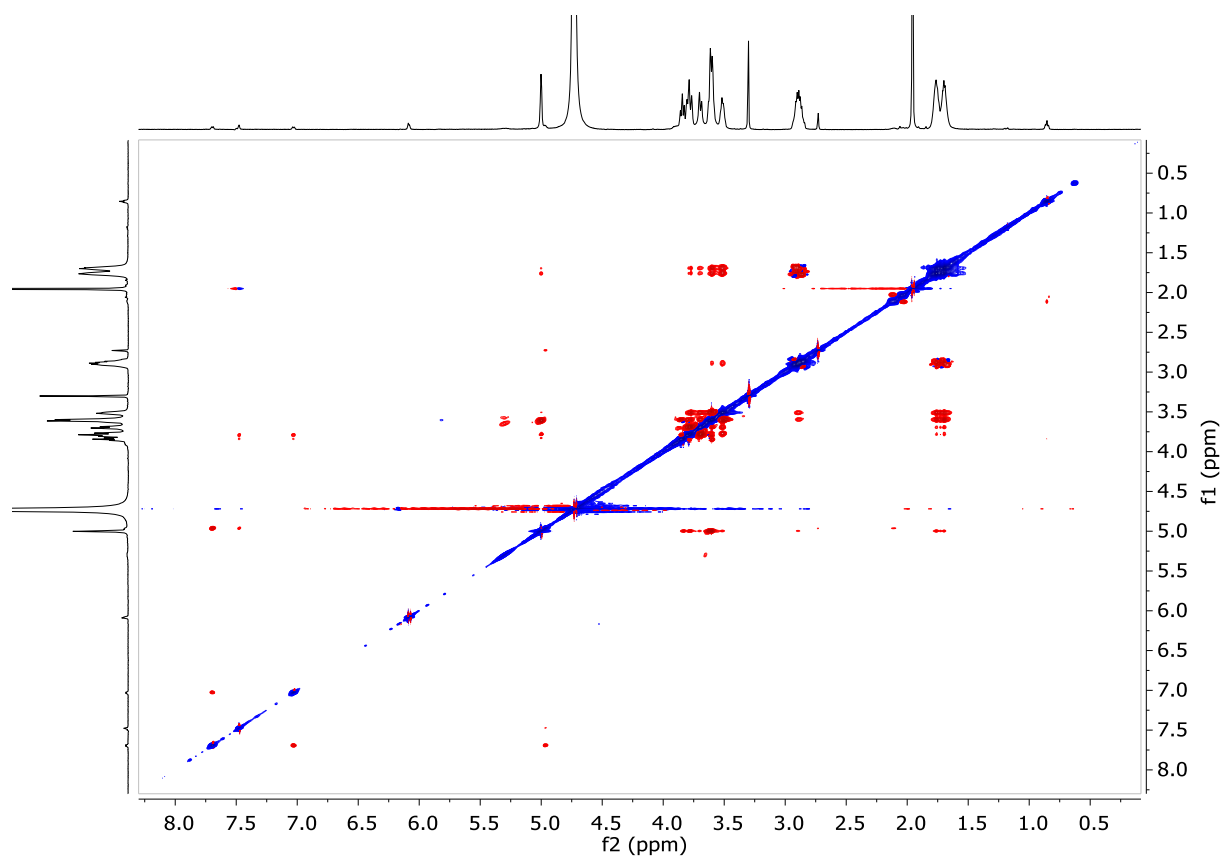

**Figure S14.** The 2D ROESY spectrum of butylone - 6-(SB)<sub>7</sub>-β-CD complex. Further conditions can be found in 3.3. *NMR experiments* section.

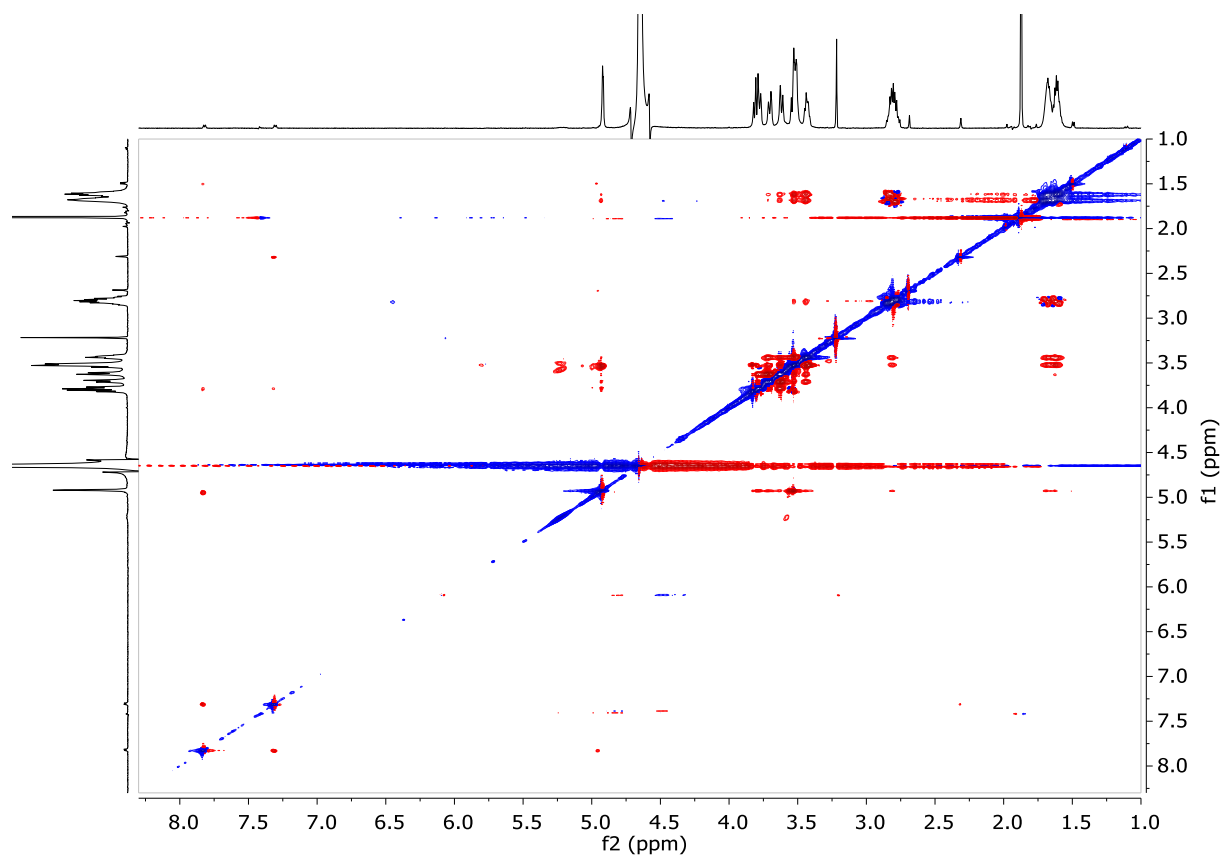

**Figure S15.** The 2D ROESY spectrum of mephedrone - 6-(SB)<sub>7</sub>-β-CD complex. Further conditions can be found in 3.3. *NMR experiments* section.

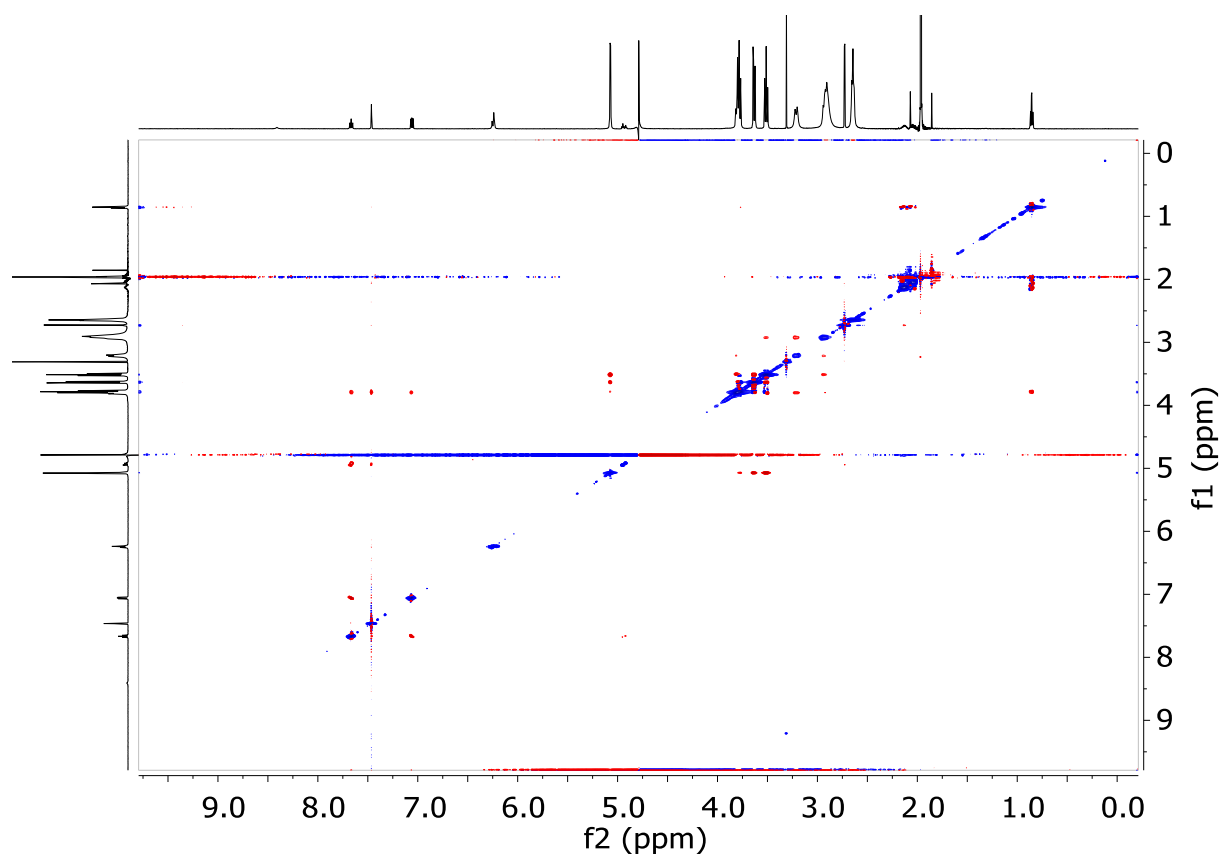

**Figure S16.** The 2D ROESY spectrum of butylone - SBX complex. Further conditions can be found in 3.3. *NMR experiments* section.

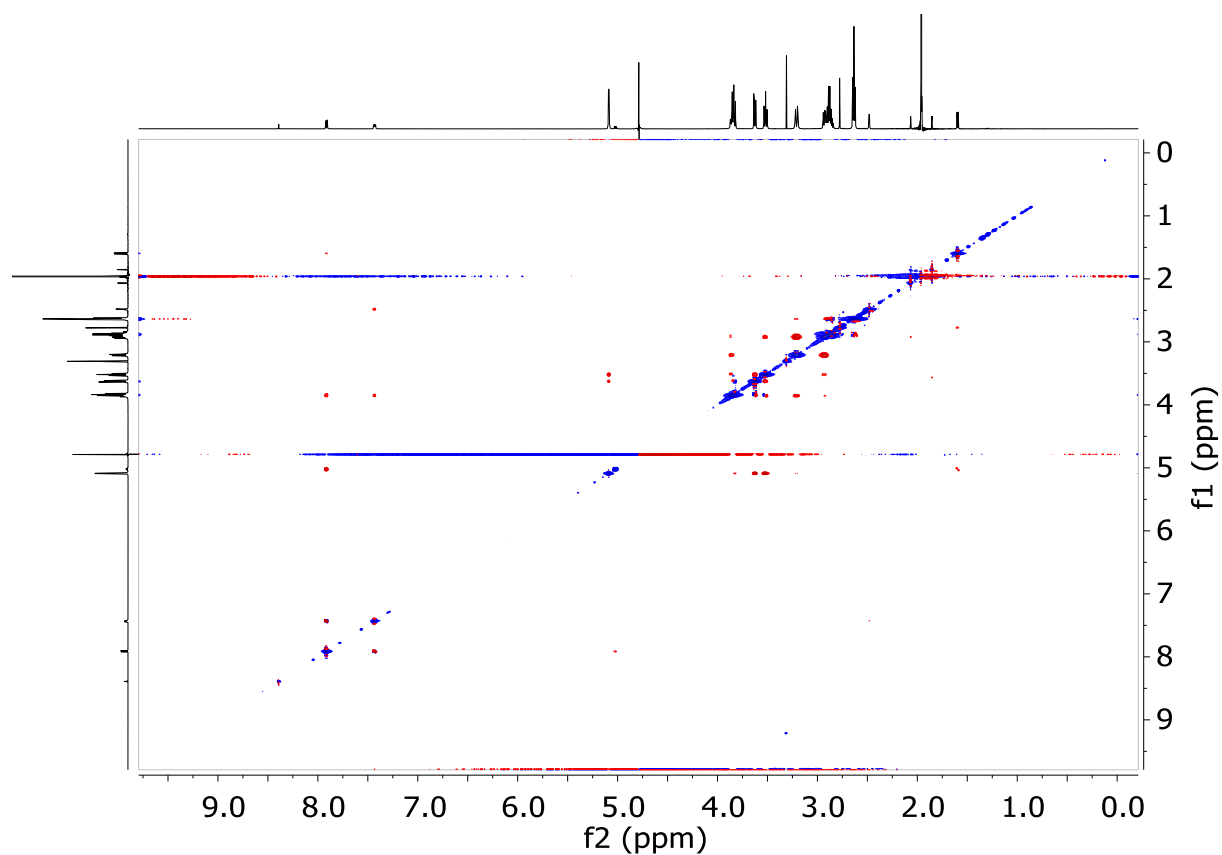

**Figure S17.** The 2D ROESY spectrum of mephedrone - SBX complex. Further conditions can be found in 3.3. *NMR experiments* section.



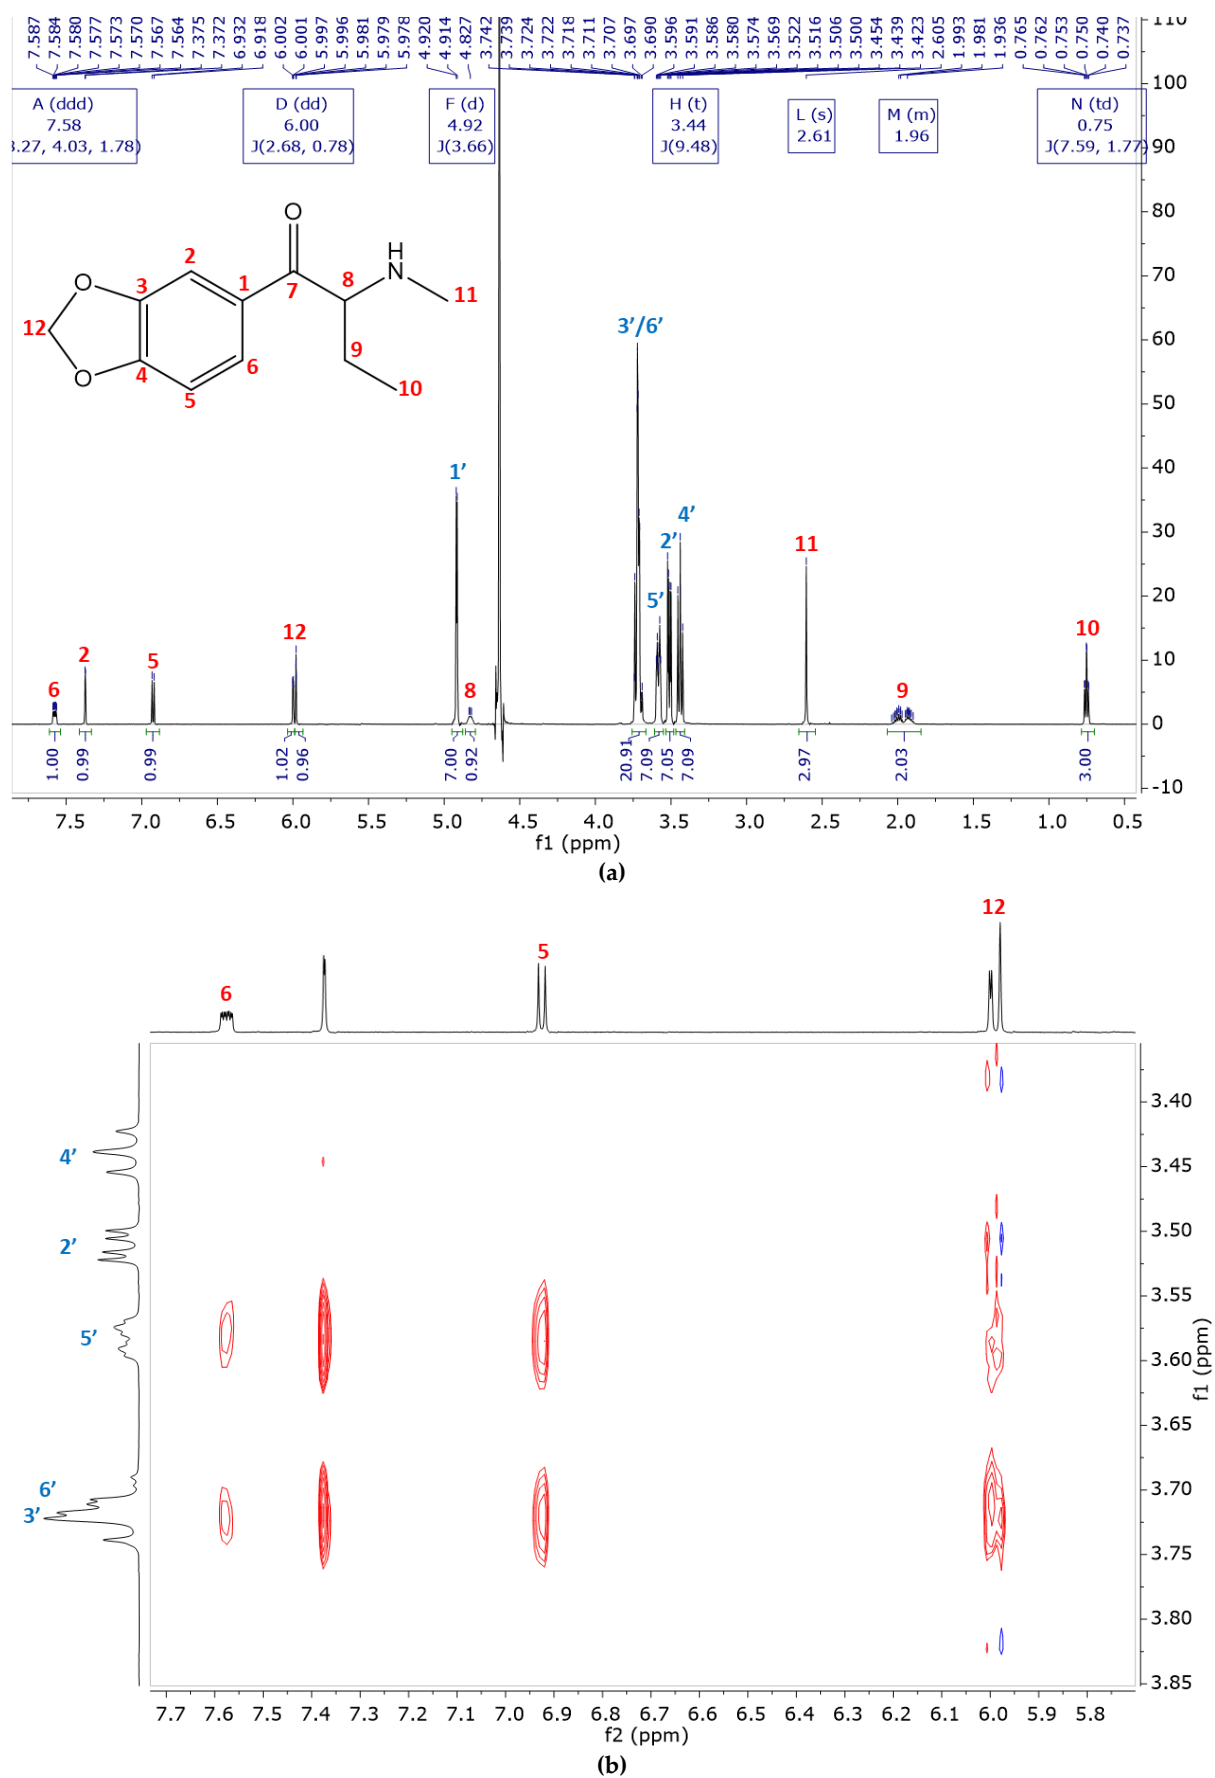

**Figure S18.** The <sup>1</sup>H NMR spectrum (a) and partial 2D ROESY spectrum (b) of butylone - β-CD complex. Further conditions can be found in 3.3. *NMR experiments* section.

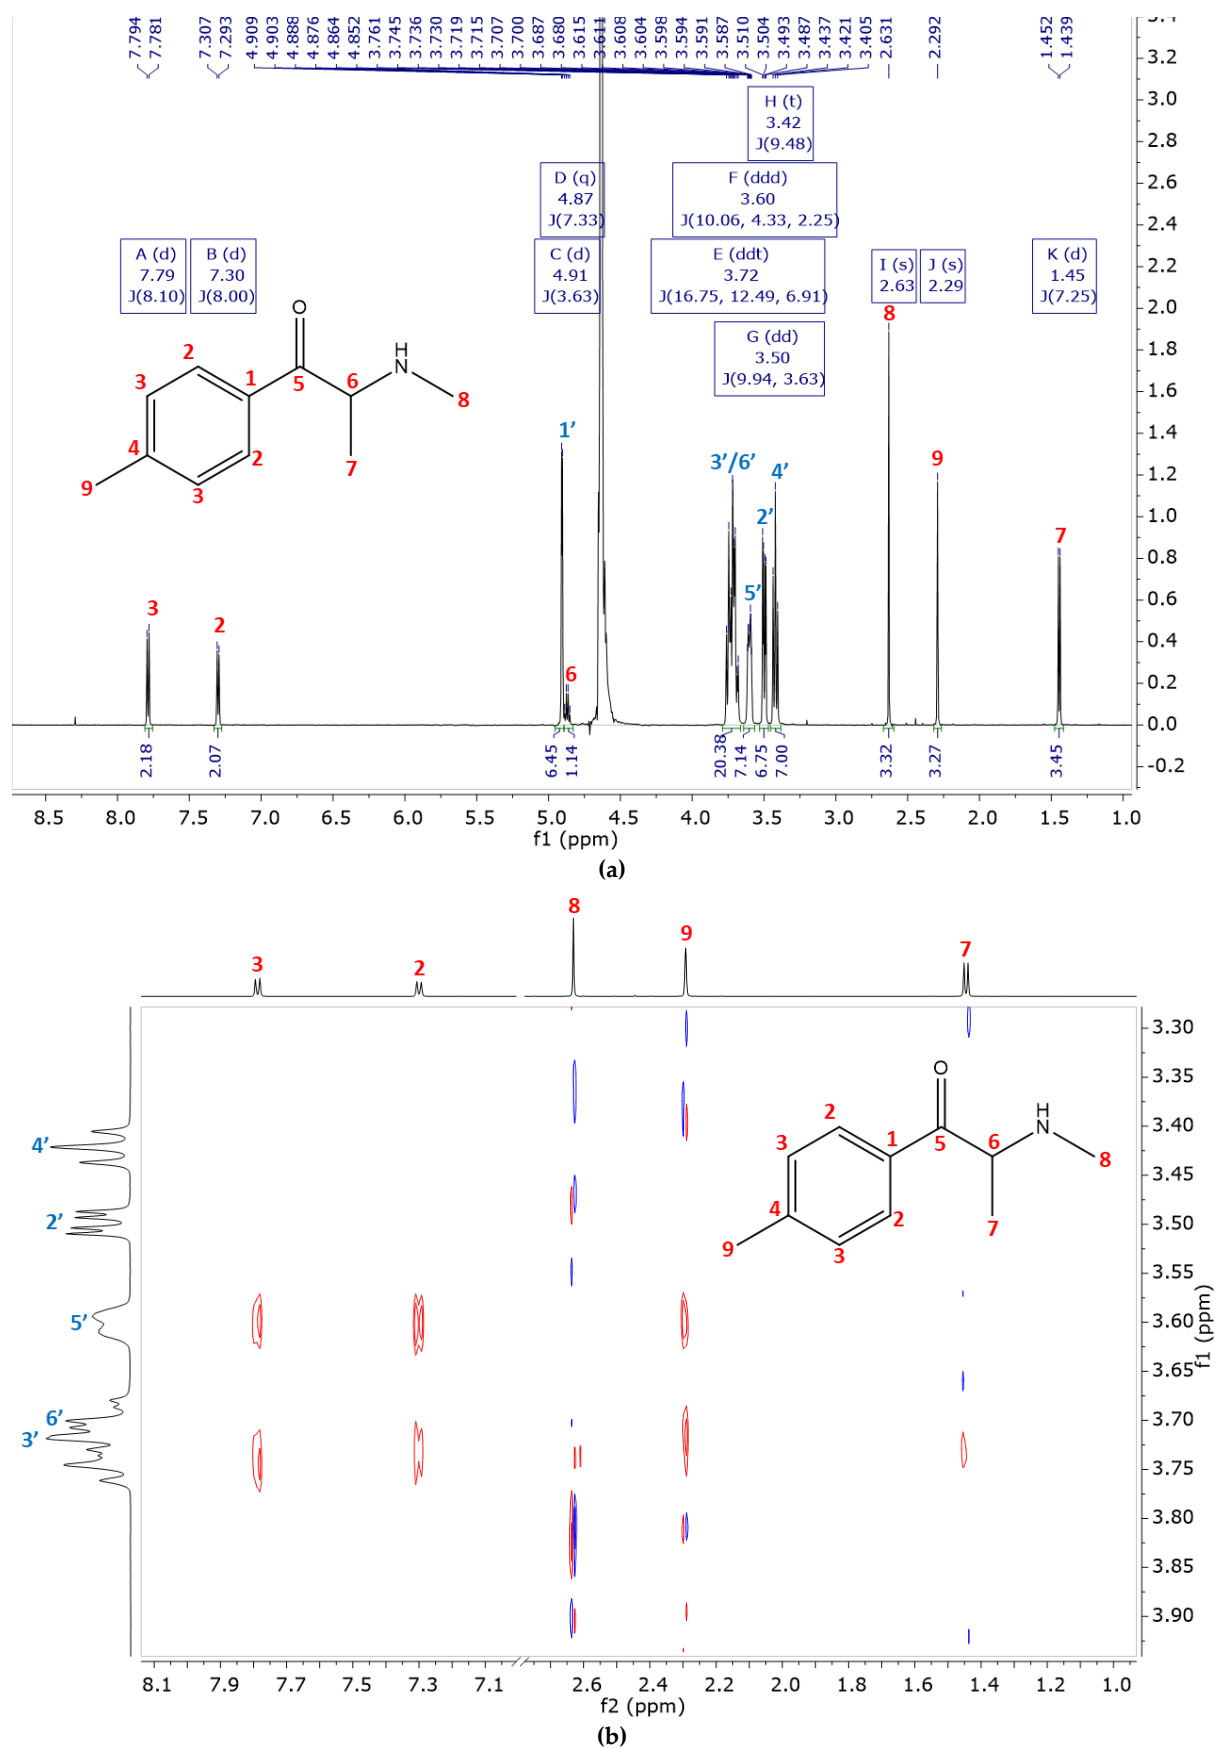

**Figure S19.** The  $^1\text{H}$  NMR spectrum (a) and partial 2D ROESY spectrum (b) of mephedrone -  $\beta$ -CD complex. Further conditions can be found in 3.3. *NMR experiments* section.

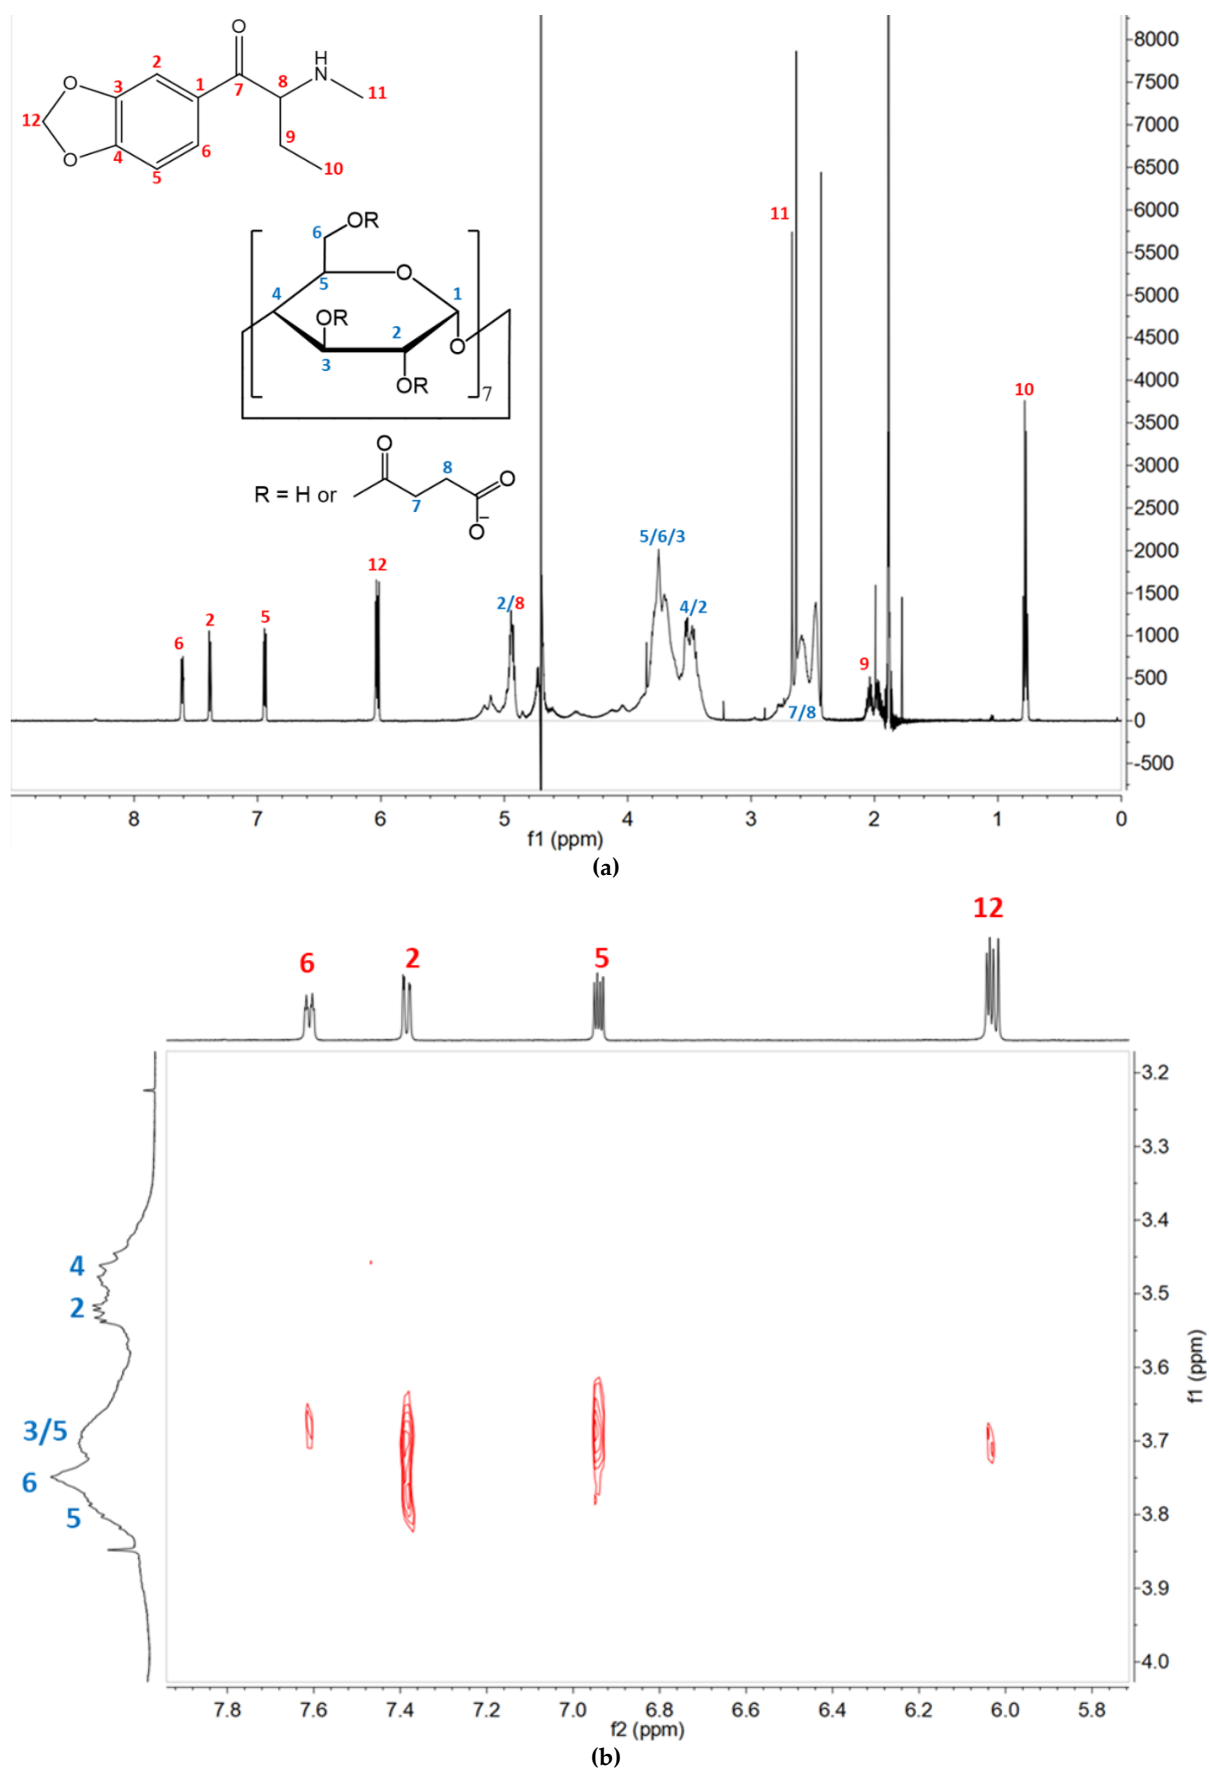

**Figure S20.** The  $^1\text{H}$  NMR spectrum (a) and partial 2D ROESY spectrum (b) of butylone - Succ- $\beta$ -CD complex. Further conditions can be found in 3.3. *NMR experiments* section.

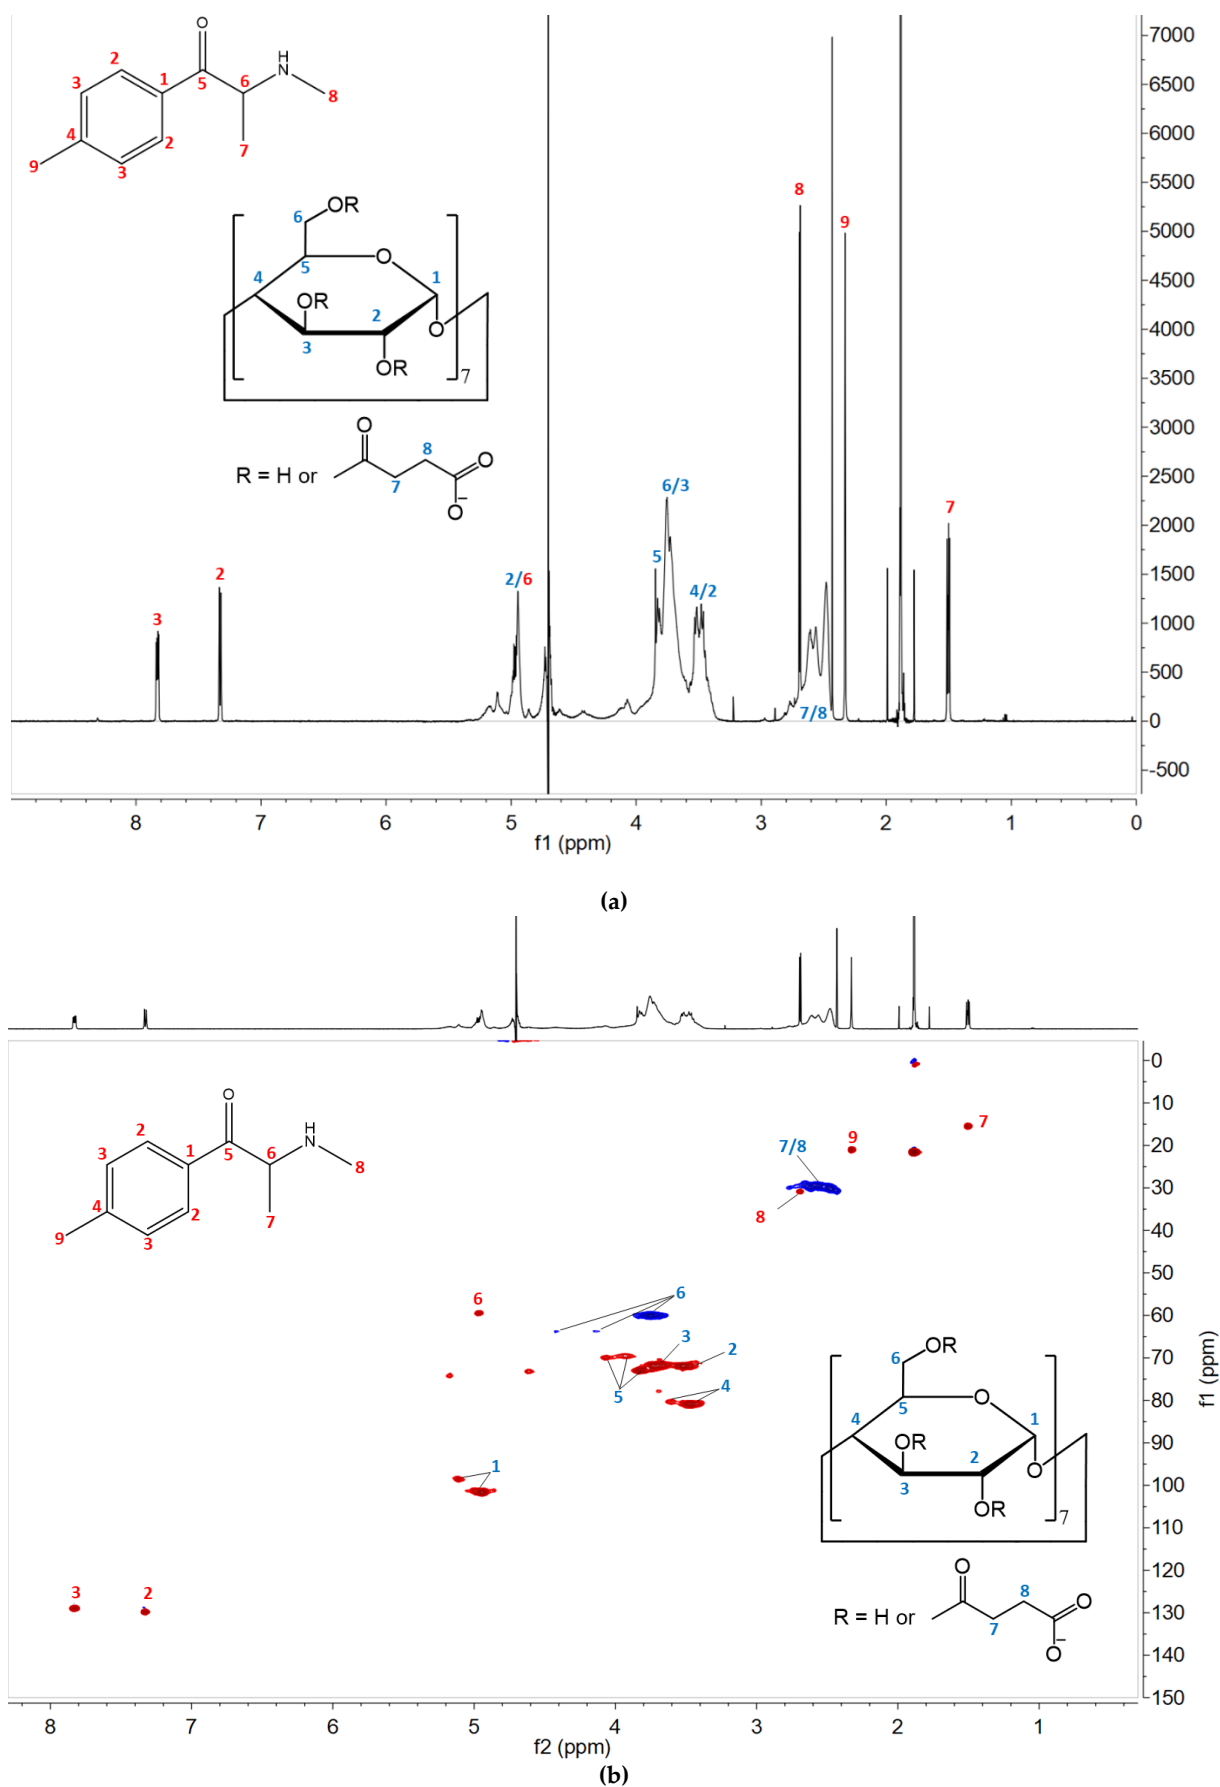

**Figure S21.** The  $^1\text{H}$  NMR spectrum (a) and  $^1\text{H}$ - $^{13}\text{C}$  HSQC spectrum (b) of mephedrone - Succ- $\beta$ -CD complex. Further conditions can be found in 3.3. *NMR experiments* section.

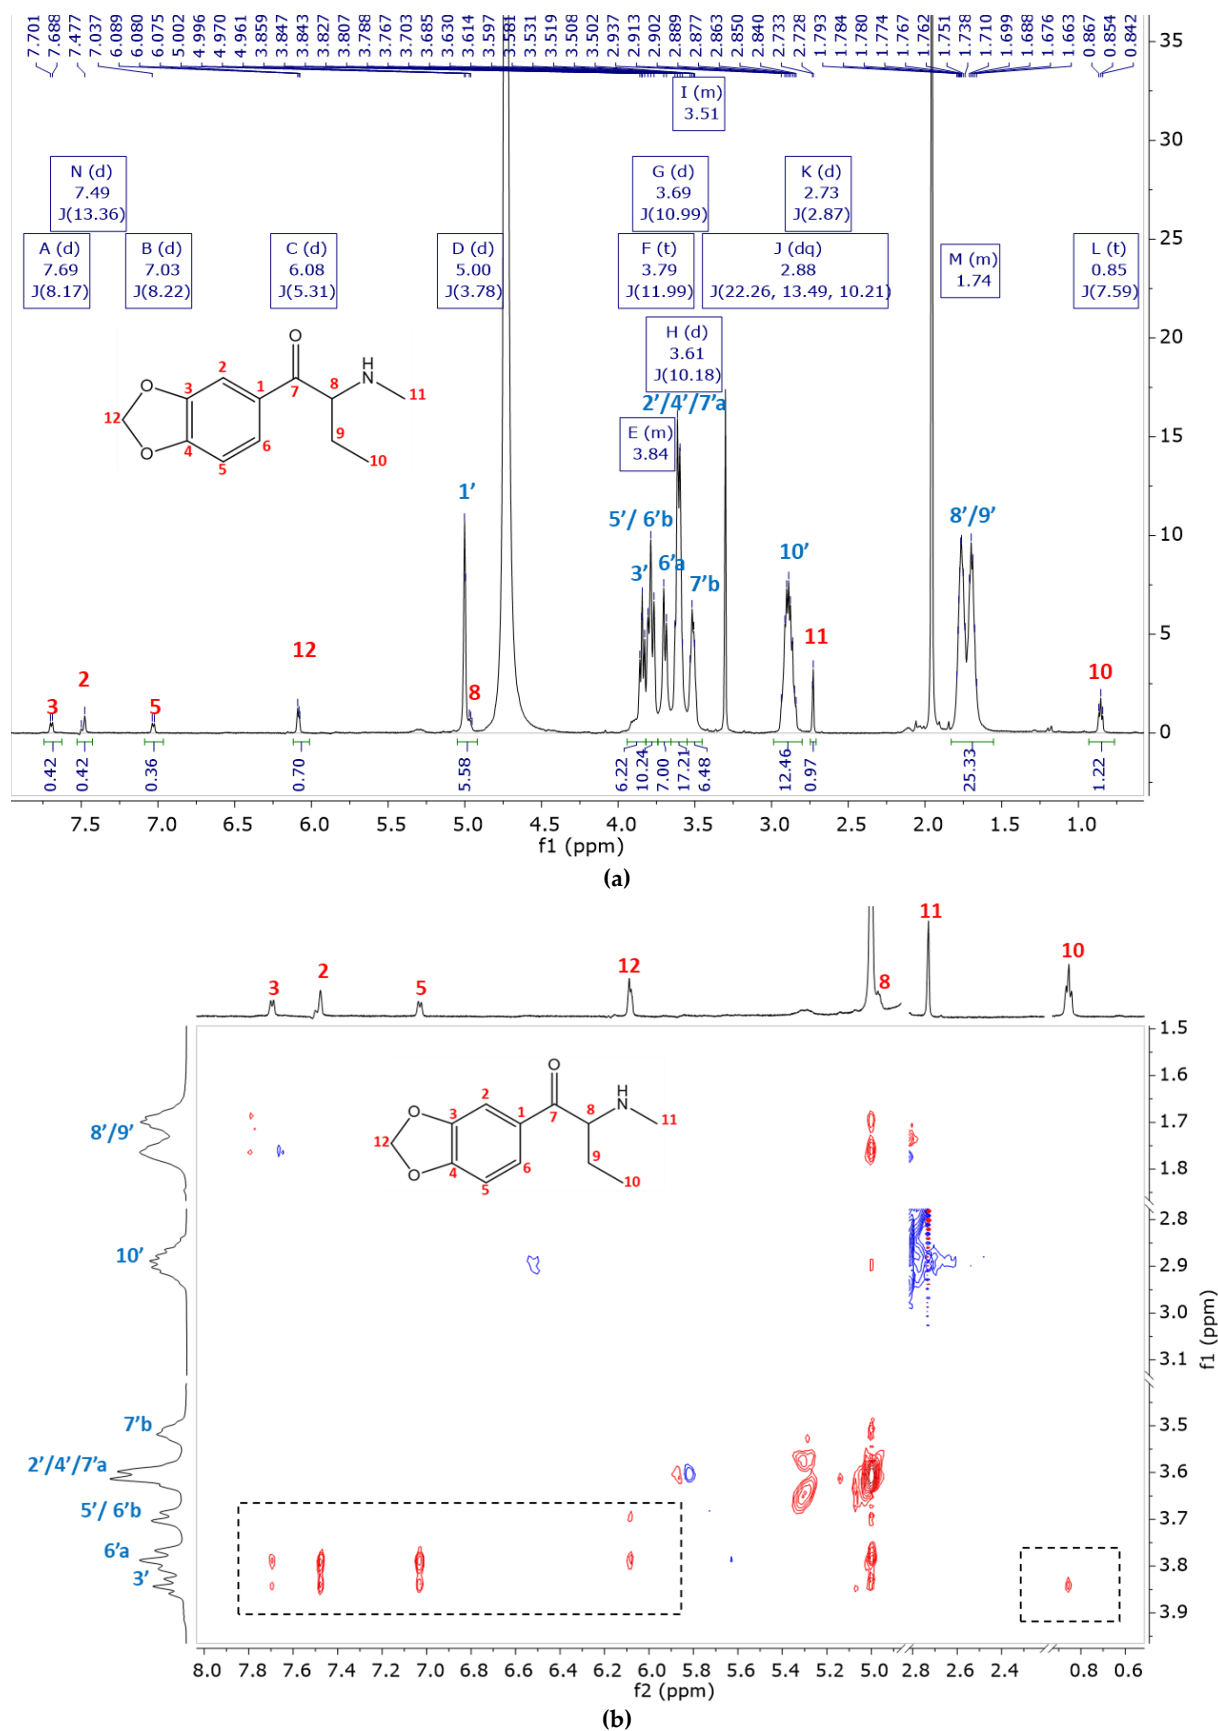

**Figure S22.** The <sup>1</sup>H NMR spectrum (a) and partial 2D ROESY spectrum (b) of butylone - 6-(SB)-β-CD complex. Further conditions can be found in 3.3. *NMR experiments* section.

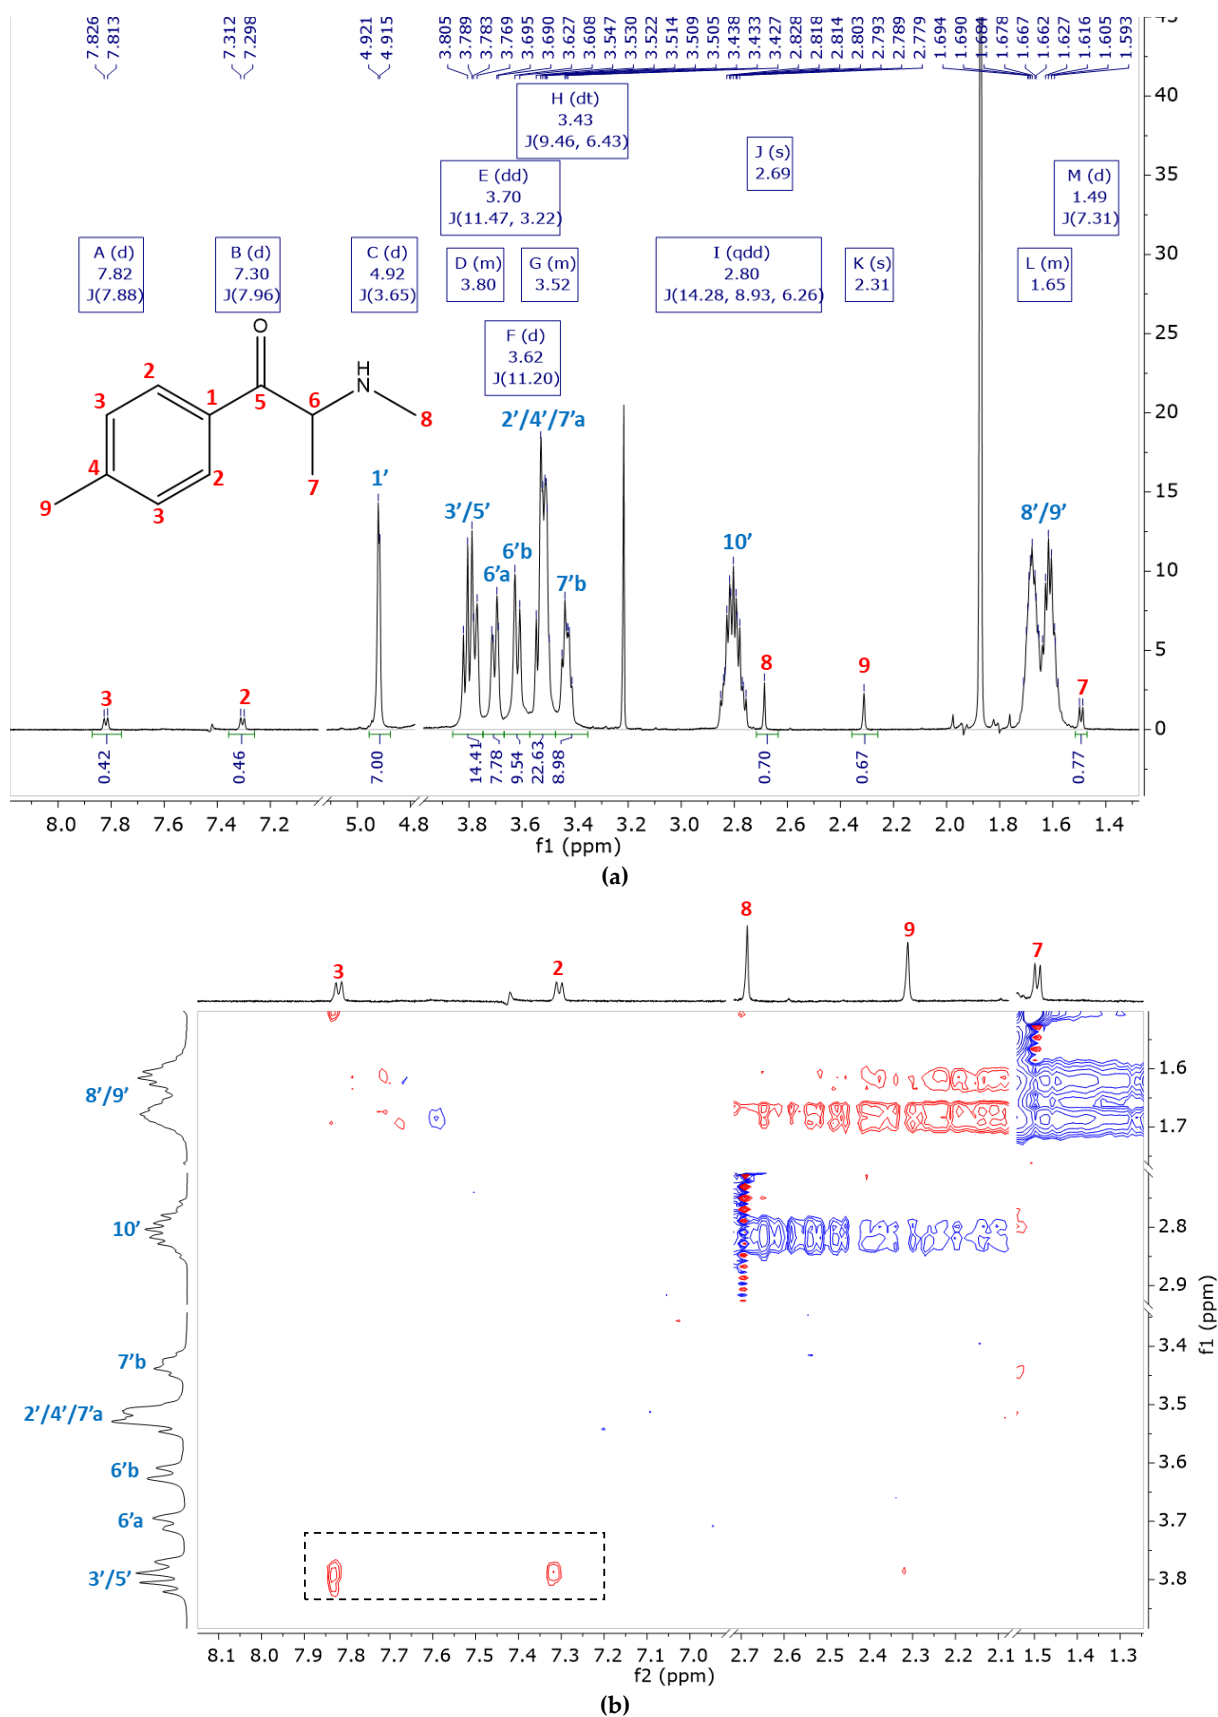

**Figure S23.** The <sup>1</sup>H NMR spectrum (a) and partial 2D ROESY spectrum (b) of mephedrone - 6-(SB)<sub>7</sub>-β-CD complex. Further conditions can be found in 3.3. *NMR experiments* section.

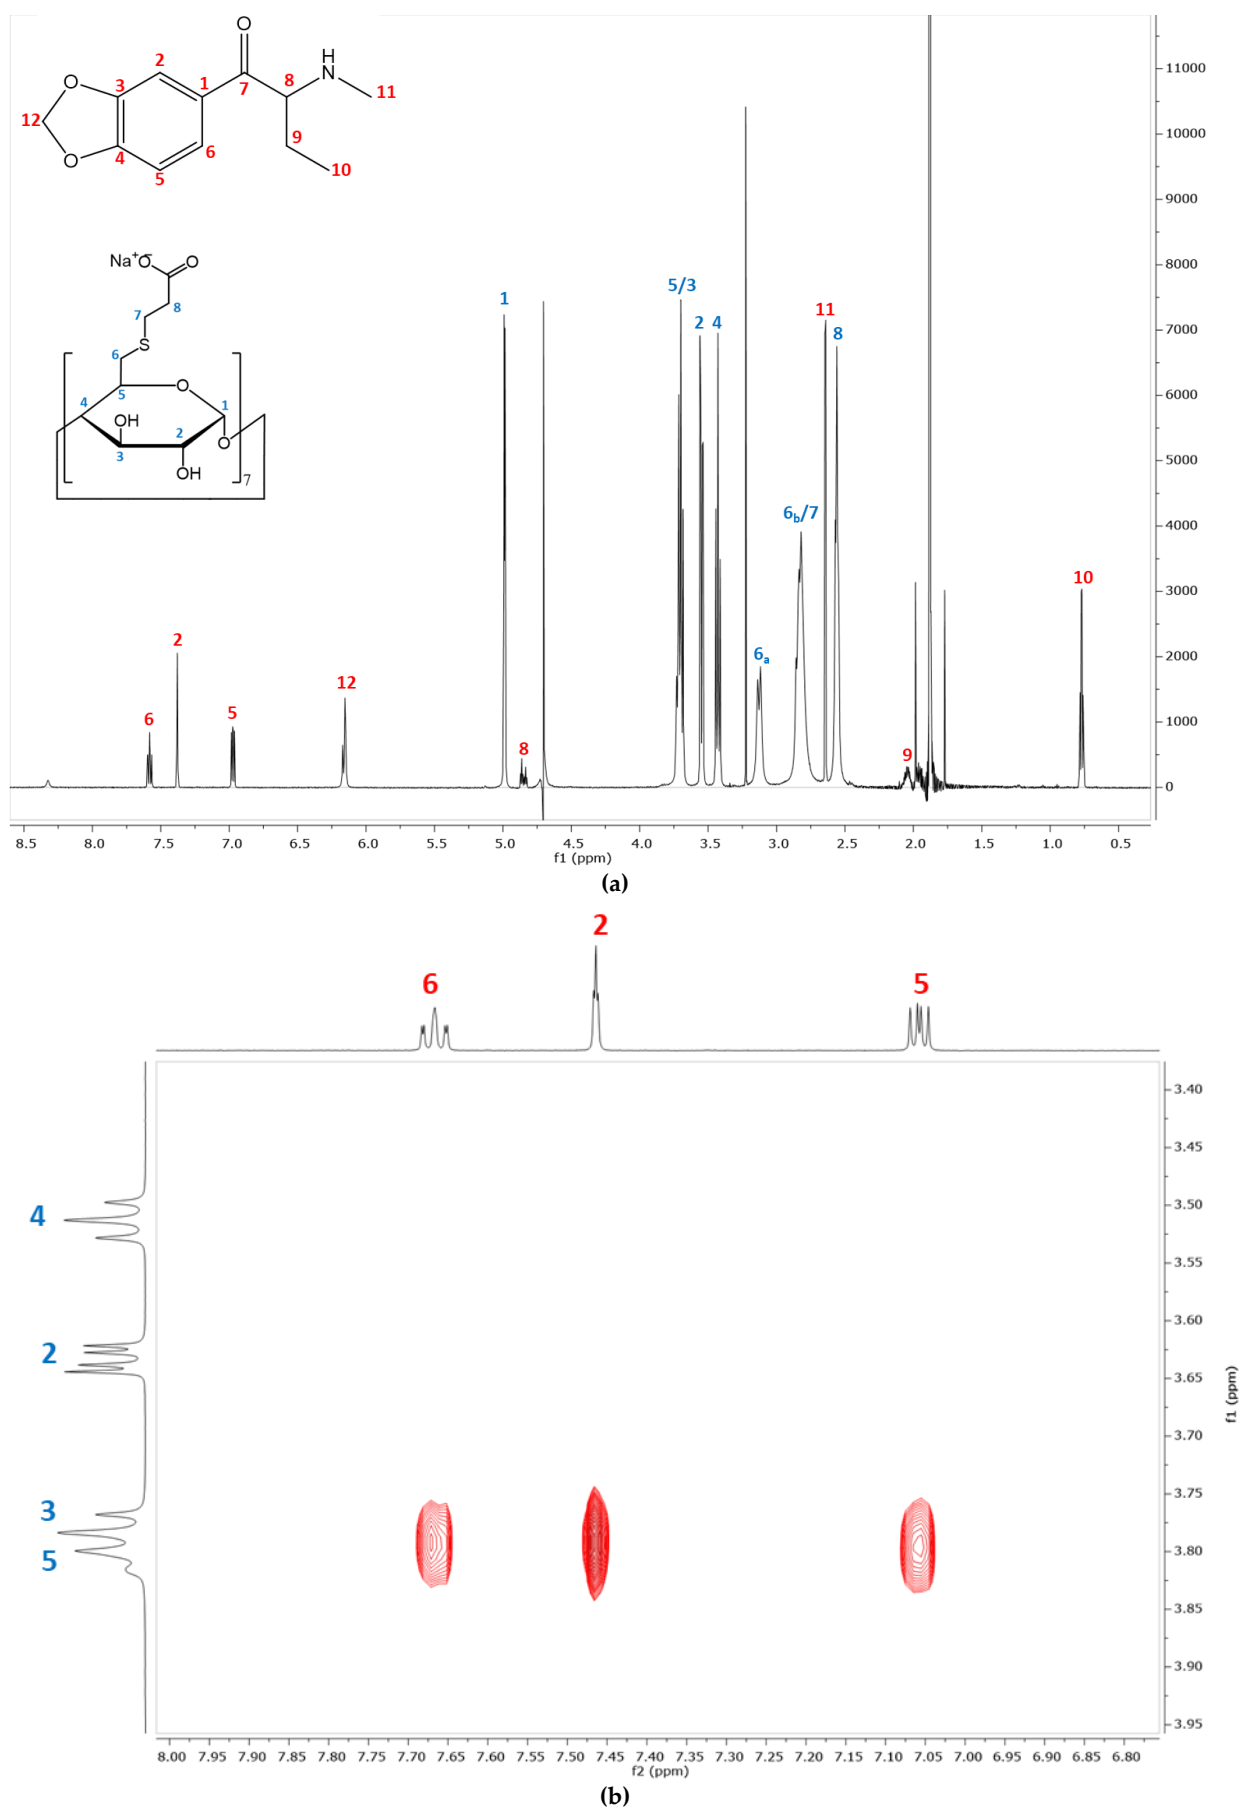

**Figure S24.** The  $^1\text{H}$  NMR spectrum (a) and partial 2D ROESY spectrum (b) of butylone - SBX complex. Further conditions can be found in 3.3. *NMR experiments* section.

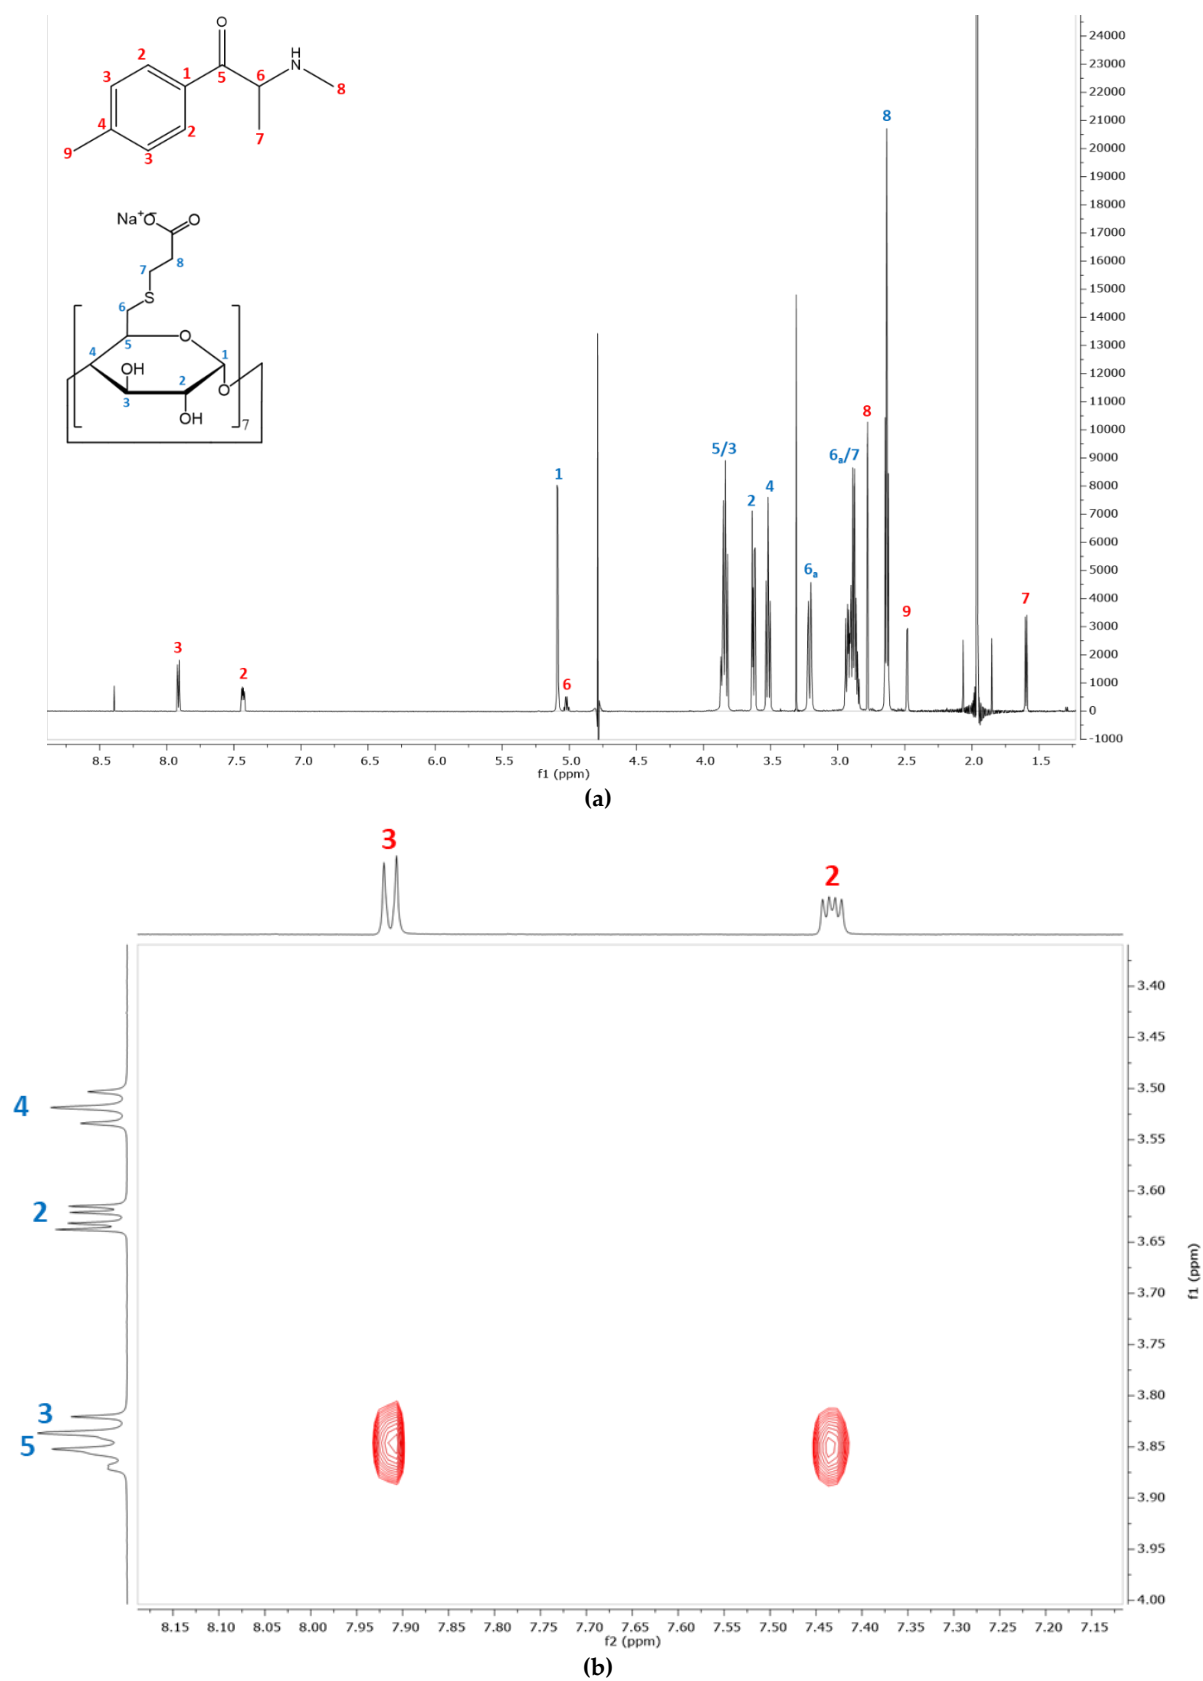

**Figure S25.** The  $^1\text{H}$  NMR spectrum (a) and partial 2D ROESY spectrum (b) of mephedrone - SBX complex. Further conditions can be found in 3.3. *NMR experiments* section.
